# Supplementary material
Source: PubMed Central journal article supplement (PMC10875986)
Supplement: NIHMS1966831-supplement-1.pdf [file NIHMS1966831-supplement-1.pdf]

# SUPPLEMENTARY INFORMATION FOR

## The Analytical Flory Random Coil is a Simple-to-Use Reference Model for Unfolded and Disordered Proteins

Jhullian J. Alston<sup>1,2\*</sup>, Garrett M. Ginell<sup>\*1,2</sup>, Andrea Soranno<sup>1,2</sup>, Alex S. Holehouse<sup>1,2,✉</sup>

<sup>1</sup>Department of Biochemistry and Molecular Biophysics, Washington University School of Medicine, St. Louis, MO, 63110, USA

<sup>2</sup>Center for Biomolecular Condensates, Washington University in St. Louis, St. Louis, MO, 63130, USA

\* These authors contributed equally to this work

✉ Corresponding author, e-mail: alex.holehouse@wustl.edu

### 1. SUPPLEMENTARY METHODS

#### *1.1 Finite size effects as assessed by the Flory characteristic ratio*

We assessed finite-size effects for FRC simulations in several ways, comparing against excluded volume (EV) simulations as a real-chain reference model. First, we compared internal scaling profiles. For real chains, residues at or near the ends have a great volume of space they can explore than residues internal to chain due to excluded volume of the chain. This manifests for internal scaling profiles whereby super-imposing a series of homopolymers of different lengths reveals the distance between residue 1 and  $n$  when 1 and  $n$  are the first and terminal residues is shorter than residue 1 and  $n$  when  $n$  is an internal residue (**Fig. 1E**). In contrast, because FRC simulations lack any excluded volume contribution, there is no difference between internal and external residues, such that all inter-residue distances of the same residue spacing are equivalent, regardless of where in the chain the two residues lie. This is even more clearly shown by calculating the normalized distance for different inter-residue spacing as a function of starting residue (**Fig. S2C, D**).

The Flory characteristic ratio as;

$$C_n = \frac{\langle R^2 \rangle}{nl^2} \quad (1)$$

Where  $n$  is the number of residues,  $l$  is the monomer size, and  $\langle R^2 \rangle$  is the ensemble-average squared end-to-end distance (or inter-residue distance)<sup>29</sup>.

Given both the FRC and AFRC models describe ideal chains, we can empirically define  $l$  as using the standard ideal chain relationship;

$$l = \sqrt{\frac{\langle R^2 \rangle}{n}} \quad (2)$$

in the limit of  $n$  tending to  $\infty$ <sup>29</sup>.

By defining  $l$  empirically from our FRC simulations or AFRC model, finite size effects emerge upon plotting  $\ln C_n$  vs.  $C_n$  (**Fig. S2E,F**). In FRC simulations,  $C_n$  is less than 1 for shorter chains. This is expected in that the rotational isomeric state means local chain geometry is not truly ideal but instead limited to the inter-residue vector path defined by the Ramachandran isomeric states. In contrast, the AFRC is a true ideal chain model, such that the Flory characteristic ratio is always 1 regardless of  $n$ . This difference between the AFRC and FRC models manifests as a very slight (1-2 Å) difference in intramolecular distances visible in **Fig. 2A**.

## 2. SUPPLEMENTARY FIGURES

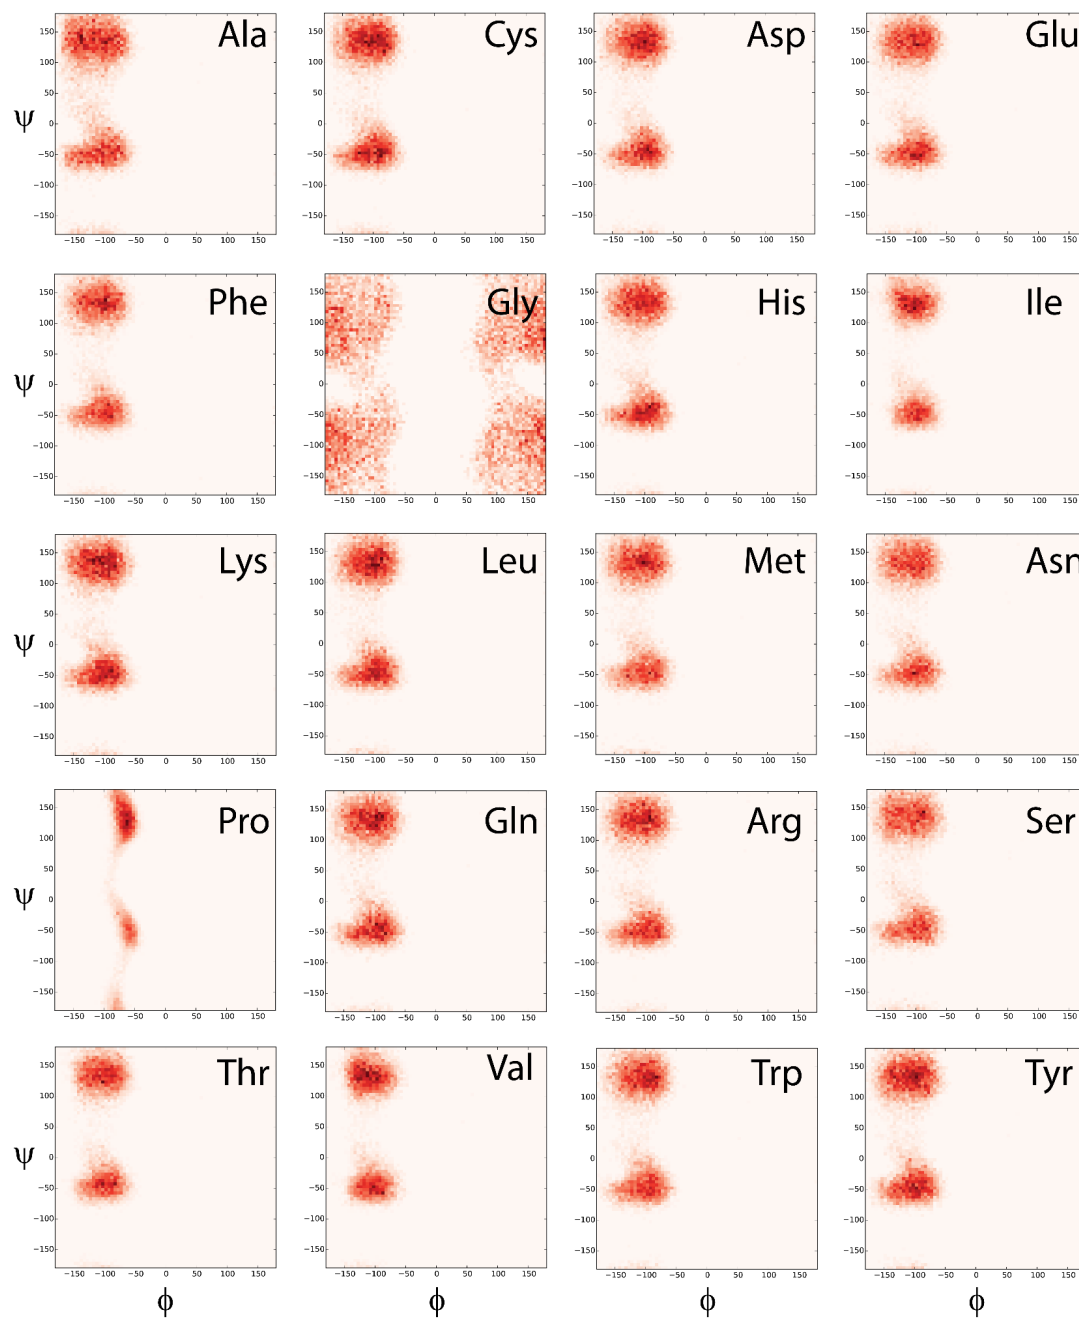

**Fig. S1 Residue-specific Ramachandran maps used for FRC simulations.** Ramachandran maps for all twenty amino acids performed as excluded volume simulations define the allowed isomeric states and are used by FRC simulations to construct the FRC ensembles.

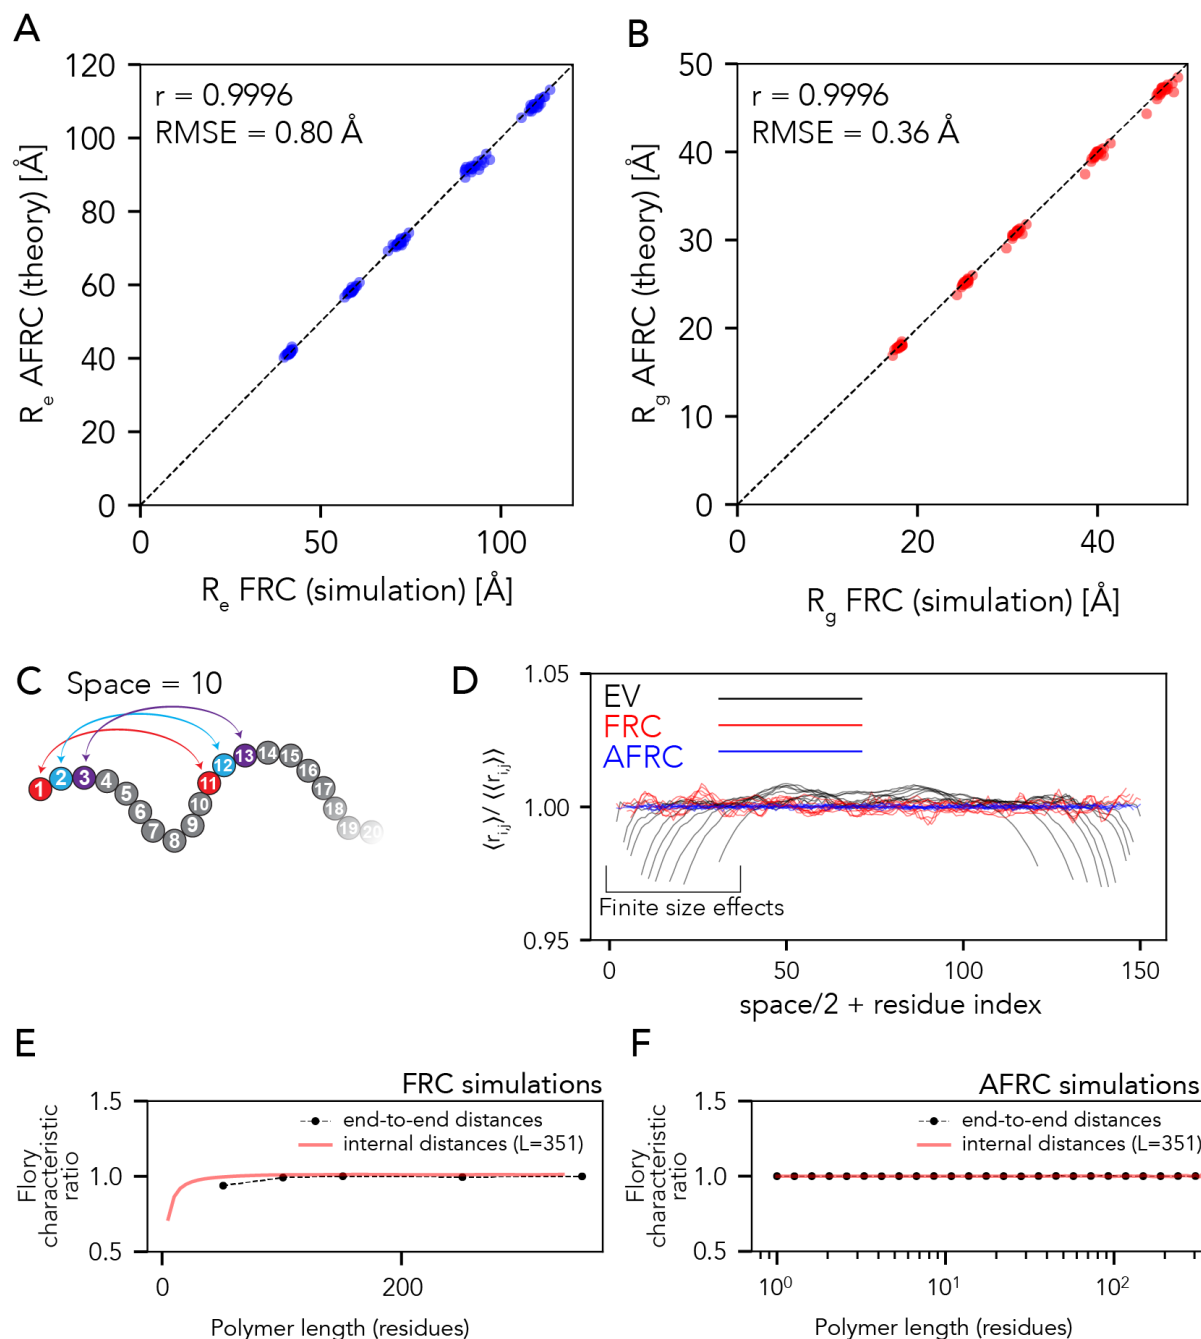

**Fig. S2 Comparison between global dimensions from simulations vs. AFRC.**

**A.** The correlation between the end-to-end distance ( $R_e$ ) obtained from FRC simulations and AFRC analysis is shown. The comparisons here are for ensemble-average values for homopolymers derived from the twenty different amino acids for lengths of 51, 101, 151, 251, and 351 residues. **B.** The correlation between radius of gyration ( $R_g$ ) values obtained from FRC simulations and AFRC analysis. Again, the comparisons here are for ensemble-average values

for homopolymers derived from the twenty different amino acids for lengths of 51, 101, 151, 251 and 351 residues. **C.** Schematic of the approach taken in panel D. **D.** For a 151-residue homopolymer, we calculated the average distance between all pairs of residues that are a fixed spacing apart for EV and FRC simulations and for the AFRC model. The inter-residue spacing used were 2, 6, 8, 10, 16, 20, 24, 32, 40, and 60 residues, and each spacing yields a different line. For example, for a spacing of 6 residues, we calculated the average distance between the following pairs of residues  $\langle r_{1,7} \rangle$ ,  $\langle r_{2,8} \rangle$ , ...,  $\langle r_{145,151} \rangle$ . Note the angle brackets here denote the ensemble-average distance. Each line represents the profile revealed by the set of inter-residue distances. For every point along the line, the y-axis position reports on the average distance normalized by the overall average distance for all residues of a given spacing. In contrast, the x-axis position is the location of the first residue of the two in a pair, to which half of the inter-residue spacing is added. For example, if we examined positions for  $\langle r_{1,7} \rangle$ ,  $\langle r_{2,8} \rangle$ , ...,  $\langle r_{145,151} \rangle$  then the corresponding x-axis positions would be  $(1 + 0.5 \times 6 = 4, 2 + 0.5 \times 6 = 5, \dots, 145 + 0.5 \times 6 = 148)$ . We take this approach such that the middle of the x-axis in the figure always corresponds to the central position in the polymer. For EV simulations, when one of the two residues in a pair falls near the end of the chain, we see a suppression of the inter-residue distances compared to the same inter-residue distance when both positions are internal to the chain. This is the expected result and reflects the fact that internal residues are ‘repelled’ by steric overlap with other residues, whereas end residues are less constrained. For FRC simulations and AFRC models, no such end effects are observed, reflecting the finite-size end effects do not influence ideal chains. **E.** We also calculated the Flory characteristic ratio ( $C_n$ ) for chains of different lengths (black circles) and for intramolecular distances (red lines) for FRC simulations. The characteristic ratio enables correlations in chain dimensions to be assessed, and for FRC simulations, we see the expected deviation from 1 at shorter chain lengths (see supplemental methods). While these deviations are expected finite-size effects, their impact when comparing inter-residue distances is minimal (**Fig. 2**).

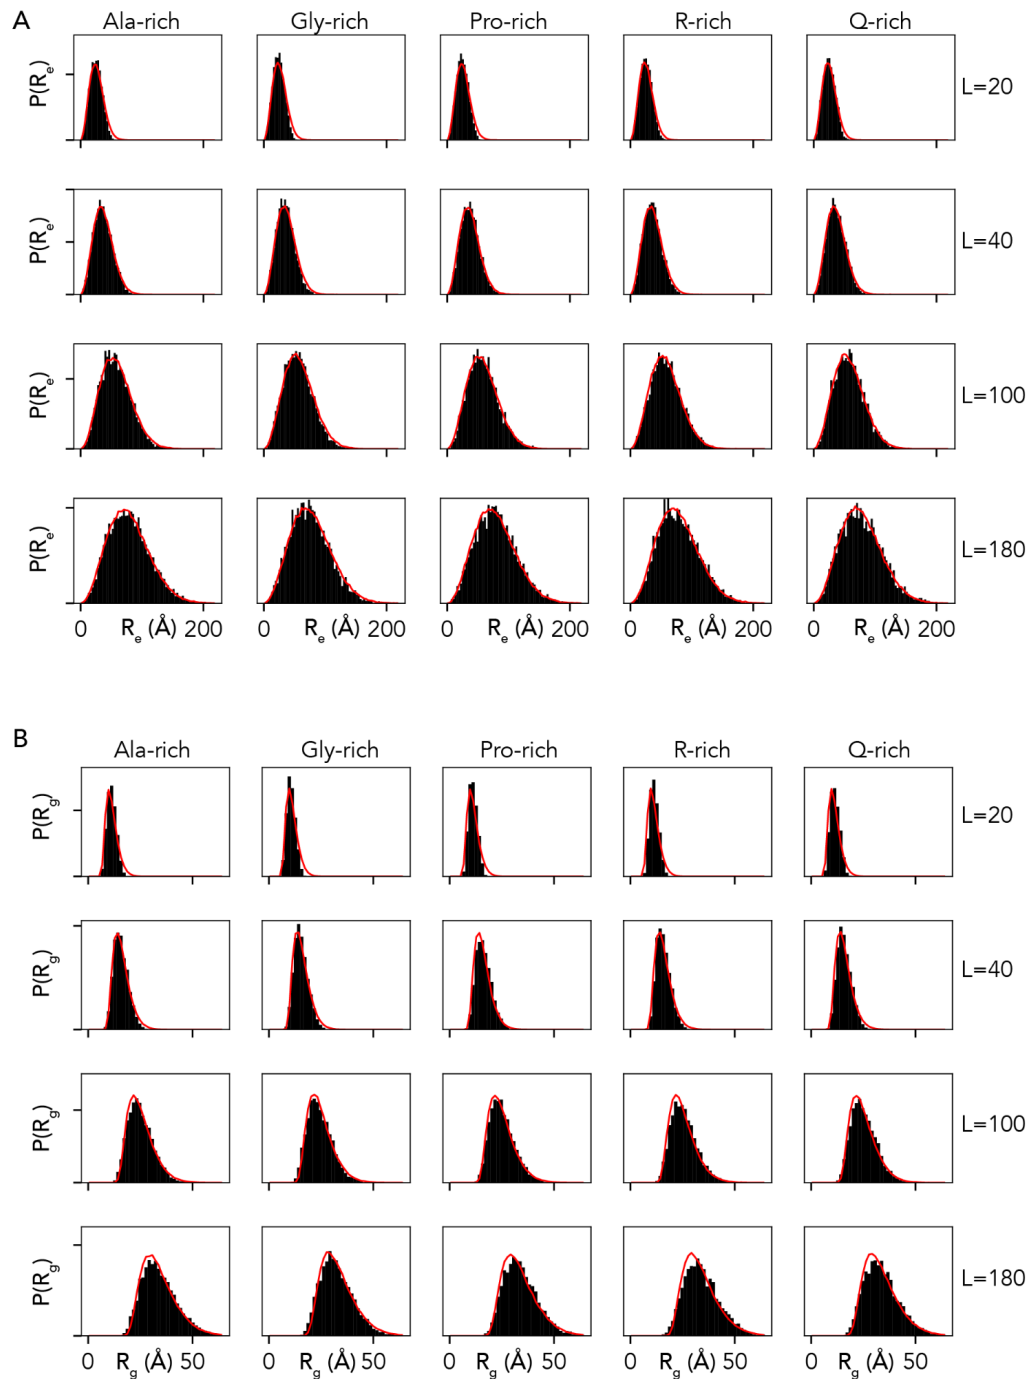

**Fig. S3 Comparison of end-to-end distance distributions and radii of gyration distributions for select heteropolymers of variable composition and length. A.**

Comparison of end-to-end distance distributions. Empirical distributions obtained from simulations are shown in black, while predictions of the distribution from the AFRC are shown as red lines. **B.** Comparison of radii of gyration distributions. Empirical distributions obtained

from simulations shown in black, while predictions of the distribution from the AFRC are shown as red lines.

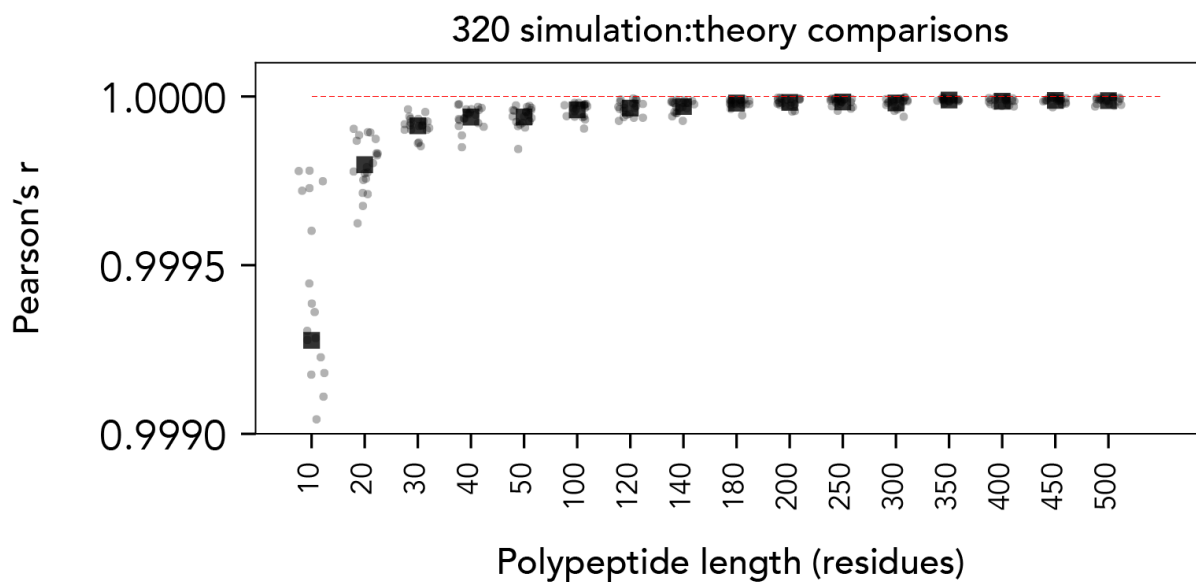

**Fig. S4. Correlation between internal scaling profiles for random heteropolymers from FRC simulations vs. AFRC-derived internal scaling profiles.** For each length (10,20,30, ..., 500) 20 different heteropolymers, were generated where each heteropolymer is enriched (30%) in one of the twenty amino acids while the remaining residues are randomly selected. This yields 320 different internal scaling comparisons (16 lengths with 20 amino acids).

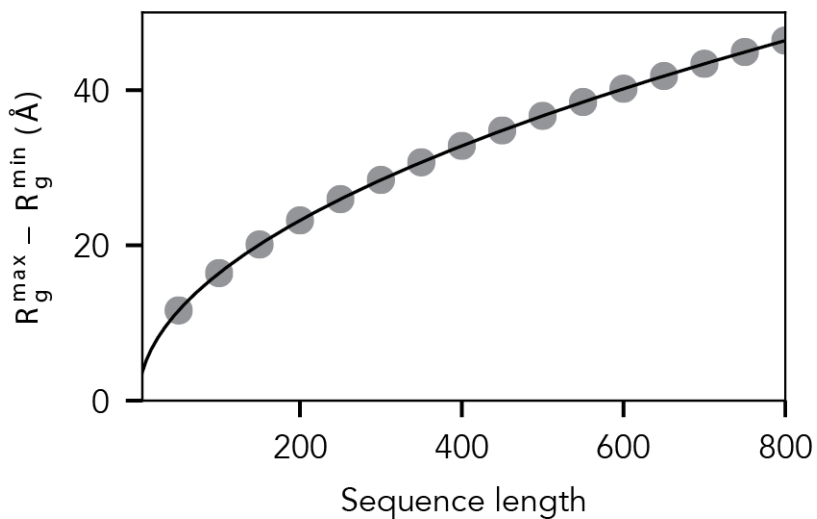

**Fig. S5.** Difference in radii of gyration based on empirical min and max values reveals the length-dependent variation in expected accessible radii of gyration values.

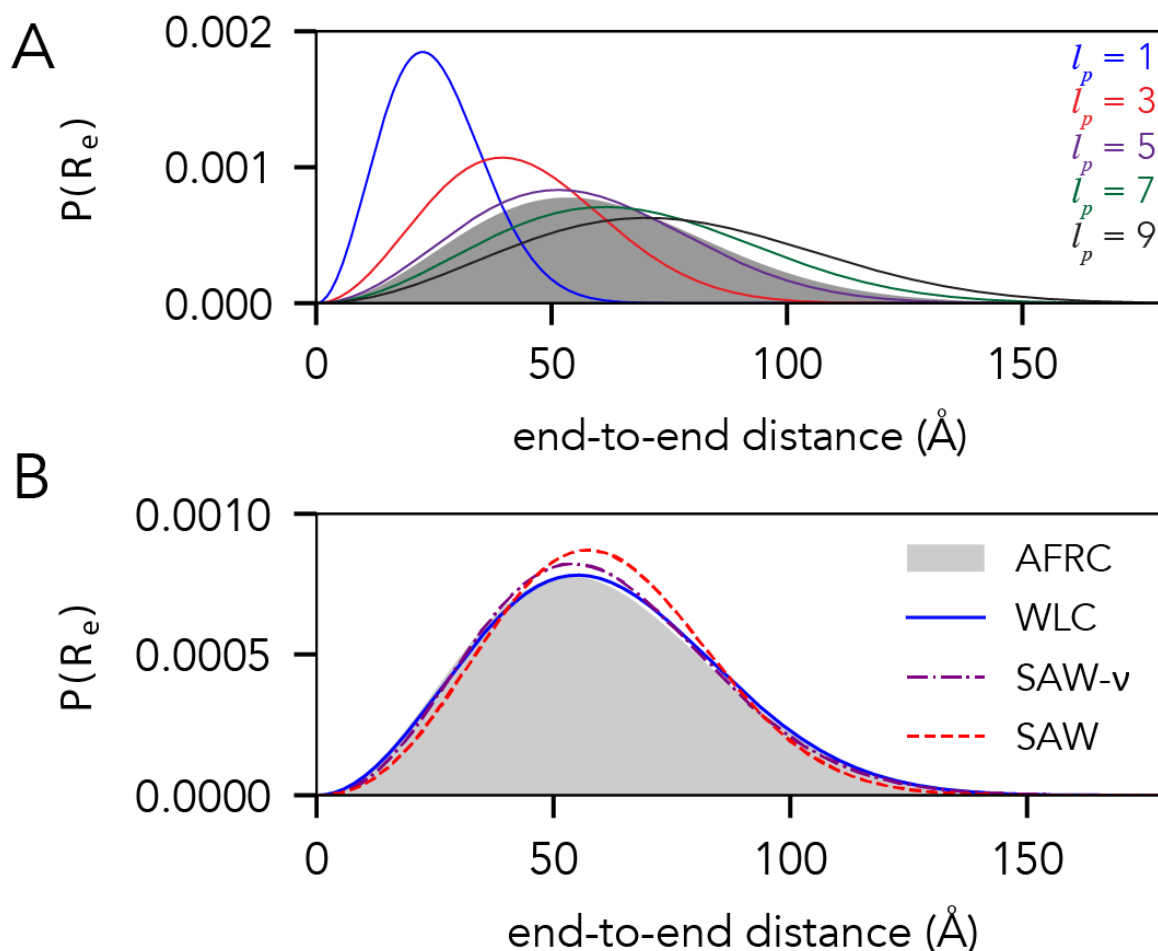

**Fig. S6.** Comparison of the end-to-end distance distributions for the AFRC with existing polymer models. **A.** Comparison of the AFRC model (grey shaded area) for 100-residue polyalanine chain ( $A_{100}$ ) with Worm-Like chain (WLC)-derived distributions, where the WLC monomer size is fixed at 3.8 Å, and the persistence length varies from 1 Å to 9 Å. **B.** Comparison of AFRC, WLC, SAW-v, and SAW models in which model input parameters were selected to reproduce the AFRC end-to-end distance distribution for an  $A_{100}$  chain. The WLC model uses an amino acid size of 3.8 Å and a persistence length of 5.7 Å. The SAW-v model uses a prefactor of 5.8 Å and a  $\nu$  of 0.5. The SAW model uses a prefactor of 4.1 Å.



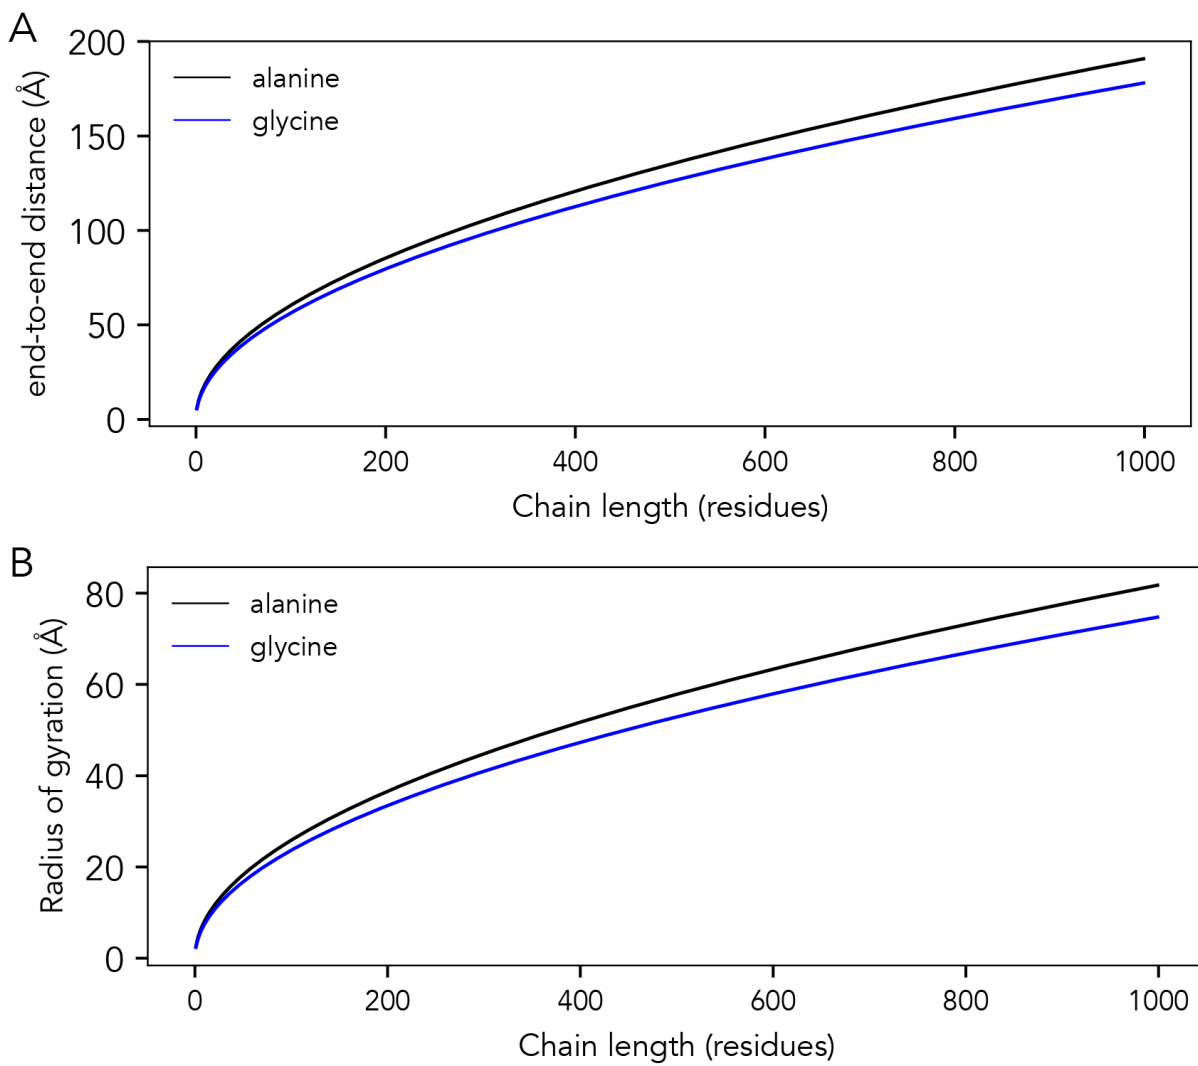

**Fig. S7.** Comparison of chain dimensions obtained from the AFRC model for poly-alanine vs. poly-glycine, examining end-to-end distance (**A**) and radius of gyration (**B**).

### 3. SUPPLEMENTARY TABLES

| Amino acid | $R_{ij}$ RMS (Å) | $R_{ij}$ (Å) | $X_0$ (Å <sup>-1</sup> ) |
|------------|------------------|--------------|--------------------------|
| A          | 6.5463           | 6.0381       | 0.5405                   |
| C          | 6.2676           | 5.7826       | 0.5635                   |
| D          | 6.3994           | 5.911        | 0.5567                   |
| E          | 6.2649           | 5.768        | 0.5613                   |
| F          | 6.2519           | 5.7612       | 0.5571                   |
| G          | 6.1045           | 5.6324       | 0.5911                   |
| H          | 6.2156           | 5.7262       | 0.5645                   |
| I          | 6.4353           | 5.9361       | 0.5483                   |
| K          | 6.306            | 5.8272       | 0.5533                   |
| L          | 6.2636           | 5.7801       | 0.5605                   |
| M          | 6.3813           | 5.8894       | 0.5501                   |
| N          | 6.2652           | 5.773        | 0.5598                   |
| P          | 6.4323           | 5.9388       | 0.5599                   |
| Q          | 6.2547           | 5.7719       | 0.5617                   |
| R          | 6.279            | 5.7921       | 0.5531                   |
| S          | 6.3161           | 5.8364       | 0.5553                   |
| T          | 6.1995           | 5.7242       | 0.5695                   |
| V          | 6.3204           | 5.8409       | 0.5571                   |
| W          | 6.3              | 5.814        | 0.5539                   |
| Y          | 6.3188           | 5.8266       | 0.5543                   |

**Table S1** Model parameters obtained by fitting against FRC simulations.

| Name   | Sequence                                                                                                                                                       |
|--------|----------------------------------------------------------------------------------------------------------------------------------------------------------------|
| Ash1   | GASASSSPSP STPTKSGKMR SRSSSPVVRPK AYTSPSPRSPN YHRFALDSPP QSPRRSSNSS<br>ITKKGSRSS GSSPTRHTTR VCV                                                                |
| p53    | MEEPQSDPSV EPPLSQETFSDLWKLLPENN VLSPLPSQAM DDLMLSDDI EQWFTEDEPGP<br>DEAPRMPEAA PPVAPAPAAP TPAAPAPAPS W                                                         |
| p27    | GSHMKGACKV PAQESQDVSG SRPAAPLIGA PANSSETHLV DPKTDPSDSQ TGLAEQCAGI<br>RKRPATDDSS TQNKRRNRTE ENVSDGSPNA GSVEQTPKKP GLRRRQT                                       |
| Notch  | MARKRRRQHG QLWFPEGFVK SEASKKKRRE PLGEDSVGLK PLKNASDGAL MDDNQNEWGD<br>EDLETKKFRF EEPVVLPLD DQTDHRQWTQ QHLDAADLRM SAMAPTTPQG EVDADCMDVN<br>VRGPDGFTPL LE         |
| ACTR   | GTQNRPLLRLN SLDDLVGPPS NLEGQSDERA LLDQLHTLLS NTDATGLEEI DRALGIPELV<br>NQQALEPKQ D                                                                              |
| drkN   | MEAIKHFDS ATADDELSFR KTQILKILNM EDDSNWYRAE LDGKEGLIPS NYIEMKNHD                                                                                                |
| Ntail  | MHHHHHTTE DKISRAVGPR QAQVSFLHGD QSENELPRLG GKEDRRVKQS RGEARESYRE<br>TGPSRASDAR AAHLPTGTPL DIDTASESSQ DPQDSRRSAD ALLRLQAMAG ISEEQGSDD<br>TPIVYNDRL LD           |
| asyn   | MDVFMKGLSK AKEGVVAAAE KTKQGVAAEA GKTKEGVLYV GSKTKEGVVH GVATVAEKT<br>EQVTNVGGAV VTGVTAVAQK TVEGAGSIAA ATGFVKKDQL GKNEEGAPQE GILEDMPVDP<br>DNEAYEMPSE EGYQDYEPEA |
| A1-LCD | GSMASASSSQ RGRSGSGNFG GGRGGGFGGN DNEGRGGNFS GRGGFGGSRG GGGYGGSGDG<br>YNGFGNDGSN FGGGGSYNDF GNYNNQSSNF GPMKGGNFGG RSSGPGGGG QYFAKPRNQG<br>GYGGSSSSSS YGSGRRF    |

**Table S2. Sequences from simulations.** Full sequences used from all-atom simulations. Amino acids are colored by chemical type as per localCIDER<sup>10</sup>.

| Name   | N   | $R_g$ (Å) | $R_g/R_g^\theta$ | $R_e$ (Å) | $R_e/R_e^\theta$ | $\nu^{app}$ (a) | Quality of $\nu^{app}$ fit (b) |
|--------|-----|-----------|------------------|-----------|------------------|-----------------|--------------------------------|
| Ash1   | 83  | 28.9      | 1.27             | 68.95     | 1.30             | 0.61            | GOOD                           |
| p53    | 91  | 29.4      | 1.23             | 77.73     | 1.39             | 0.66            | GOOD                           |
| p27    | 107 | 28.3      | 1.09             | 59.15     | 0.98             | 0.49            | POOR                           |
| Notch  | 132 | 29.3      | 1.02             | 52.16     | 0.78             | 0.34            | POOR                           |
| ACTR   | 71  | 21.1      | 1.01             | 41.45     | 0.85             | 0.50            | GOOD                           |
| drkN   | 59  | 19.3      | 1.00             | 45.26     | 1.01             | 0.43            | GOOD                           |
| Ntail  | 132 | 26.3      | 0.92             | 58.11     | 0.87             | 0.39            | POOR                           |
| asyn   | 140 | 25.6      | 0.87             | 46.47     | 0.67             | 0.23            | POOR                           |
| A1-LCD | 137 | 24.1      | 0.84             | 54.37     | 0.81             | 0.47            | GOOD                           |

<sup>a</sup> Estimated  $\nu^{app}$  based on linear fitting of the internal scaling regime using SOURSOP.

<sup>b</sup> Quality of fit based on the reduced chi-squared from the fit.

**Table S3:** Simulation and AFRC-derived parameters for all-atom simulations.

**Table S4:** SAXS sequences and values (note table caption comes before table as table is 36 pages long). Note that when error is reported as 0, this means an accurate error could not be determined, not that the measurement is perfect.

| Protein name                    | R <sub>g</sub> (Å) | R <sub>g</sub> error (Å) | Amino acid sequence                                                                       | Reference                                                                                                                                                                                                                                                                                                    |
|---------------------------------|--------------------|--------------------------|-------------------------------------------------------------------------------------------|--------------------------------------------------------------------------------------------------------------------------------------------------------------------------------------------------------------------------------------------------------------------------------------------------------------|
| Nucleoporin<br>Nup49 (N49)      | 15.9               | 1.3                      | GCQTSRGLFGNNNTNNINSSSGMNNASAGLF<br>GSKPCA                                                 | Fuertes, et al. PNAS (2017)<br>114, E6342–E6351.                                                                                                                                                                                                                                                             |
| Heh2 (NLS)                      | 24                 | 3                        | ACETNKRKREQISTDNEAKMQIQEEKSPKKRK<br>KRSSKANKPPECA                                         | Fuertes, et al. PNAS (2017)<br>114, E6342–E6351.                                                                                                                                                                                                                                                             |
| VSV Protein<br>Phosphoprotein P | 24                 | 1                        | HHHHHELMNLTkVREYLKSYSRLDQAVGEIDEI<br>EAQRAEKSNYELFQEDGVVEHTKPSYFQAADDS                    | Leyrat, C., Jensen, M.R.,<br>Ribeiro, E.A., Gérard, F.C.A.,<br>Ruigrok, R.W.H., Blackledge,<br>M., and Jamin, M. (2011). The<br>NO-binding region of the<br>vesicular stomatitis virus<br>phosphoprotein is globally<br>disordered but contains<br>transient $\alpha$ -helices. Protein Sci.<br>20, 542–556. |
| LS                              | 27.9               | 1                        | SPPGKPGPPQQEGNKPGPPPPGKPGPPPA<br>GGNPQQPQAPPAGKPGPPPPQGGRRPPRA<br>QGQQPPQ                 | Boze, H., Marlin, T., Durand,<br>D., Pérez, J., Vernhet, A.,<br>Canon, F., Sarni-Manchado, P.,<br>Cheynier, V., and Cabane, B.<br>(2010). Proline-rich salivary<br>proteins have extended<br>conformations. Biophys. J. 99,<br>656–665.                                                                      |
| Nup153_NUS                      | 24.9               | 1.3                      | GCPSASPAFGANQTPTFGQSQGASQPNPPGFG<br>SISSTALFPTGSQPAPPTFGTVSSSSQPPVFGQ<br>QPSQSAFGSGTTPNCA | Fuertes, et al. PNAS (2017)<br>114, E6342–E6351.                                                                                                                                                                                                                                                             |

|                                                            |       |     |                                                                                                                                     |                                                                                                                                                                                                                                           |
|------------------------------------------------------------|-------|-----|-------------------------------------------------------------------------------------------------------------------------------------|-------------------------------------------------------------------------------------------------------------------------------------------------------------------------------------------------------------------------------------------|
| Sic1                                                       | 30    | 4   | GSMTPTPPRSRGTRYLAQPSGNTSSSALMQG<br>QKTPQKPSQNLVPTSTTKSFKNAPLLAPPNSN<br>MGMTSPFNGLTSPQRSPFPKSSVKRT                                   | Gomes G-NW, Krzeminski M, Namini A, Martin EW, Mittag T, Head-Gordon T, et al. Conformational Ensembles of an Intrinsically Disordered Protein Consistent with NMR, SAXS, and Single-Molecule FRET. J Am Chem Soc. 2020;142: 15697–15710. |
| chloroplastic calvin cycle protein                         | 23    |     | HHHHHHHHHSSGHIEGRHMSGQPAVDLNKKV<br>QDAVKEAEDACAKGTSADCAVAWDTVEELSAAV<br>SHKKDAVKADVTLTDPLEAFCKDAPDADECRVY<br>ED                     | Launay H, Barré P, Puppo C, Zhang Y, Maneville S, Gontero B, Receveur-Bréchet V, J Mol Biol 430(8):1218-1234 (2018)                                                                                                                       |
| Antitermination protein N (from lambda phage)              | 38    | 3.5 | MDAQRTRRERRAEKQAQWKAANPLLVGVSAPK<br>VNRPILSLNRKPKSRVESALNPIDLTVLAEYHKQI<br>ESNLQRIERKNQRTWYSKPGERGITCSGRQKIK<br>GKSIPLI             | Johansen, D., Trehwella, J., and Goldenberg, D.P. (2011). Fractal dimension of an intrinsically disordered protein: small-angle X-ray scattering and computational study of the bacteriophage λ N protein. Protein Sci. 20, 1955–1970.    |
| Nup153_NUL                                                 | 30    | 3   | GCGFKGFDTSSSSNSAASSFFKFGVSSSSSGP<br>SQTLTSTGNFKFGDQGGFKIGVSSDSGSINPMS<br>EGFKFSKPIGDFKFGVSSSESKPEEVKKDSKDNF<br>KFGLSGLSNPVCA        | Fuertes, et al. PNAS (2017) 114, E6342–E6351.                                                                                                                                                                                             |
| DARPP-32 (aka Protein phosphatase 1 regulatory subunit 1B) | 28.28 |     | MDPKDRKKIQFSVPAPPSQLDPRQVEMIRRRRP<br>TPALLFRVSEHSSPEEESSPHQRTSGEGHHPKS<br>KRPNPCAYTPPSLKAVQRIAESHLQTISNLSENQ<br>ASEEEDELGELRELGYPPQ | Marsh, J.A., Dancheck, B., Ragusa, M.J., Allaire, M., Forman-Kay, J.D., and Peti, W. (2010). Structural diversity in free and bound states of intrinsically disordered protein phosphatase 1 regulators. Structure 18, 1094–1103.         |

|                                 |      |     |                                                                                                                                                                              |                                                                                                                                                                                                                                                                                          |
|---------------------------------|------|-----|------------------------------------------------------------------------------------------------------------------------------------------------------------------------------|------------------------------------------------------------------------------------------------------------------------------------------------------------------------------------------------------------------------------------------------------------------------------------------|
| II-1                            | 41   |     | GKPVGRRPQGGNQPQRPPPPGKPPQGGPPQGGNQSQGGPPPPGKPEGRPPQGRNQSQGGPPH<br>PGKPERPPQGGNQSQGTTPPPGKPERPPQGGNQSQRGPPPH<br>RGKPEGPPQEGNKS                                                | Boze, H., Marlin, T., Durand, D., Pérez, J., Vernhet, A., Canon, F., Sarni-Manchado, P., Cheynier, V., and Cabane, B. (2010). Proline-rich salivary proteins have extended conformations. <i>Biophys. J.</i> 99, 656–665.                                                                |
| Fhua                            | 33.4 |     | ESAWGPAATIAARQSATGKTKDTPIQKVPQSSISV<br>VTAEEMALHQP KSVKEALSYPGVSVGTRGASN<br>TYDHLIIRGFAAEGQSQNNYLNGLKLGNFYND<br>VIDPYMLERAEIMRGPVSVLYGKSSPGLLNMVS<br>KRPTTEP                 | Riback, J.A., Bowman, M.A., Zmyslowski, A.M., Knoverek, C.R., Jumper, J.M., Hinshaw, J.R., Kaye, E.B., Freed, K.F., Clark, P.L., and Sosnick, T.R. (2017). Innovative scattering analysis shows that hydrophobic disordered proteins are expanded in water. <i>Science</i> 358, 238–241. |
| N98                             | 28.6 | 1.3 | GCFNKSFGT PFGGGTGGFGTTSTFGQNTGFGT<br>TSGGAFGTS AFGSSNNTGGLFGNSQTKPGGLF<br>GTSSFSQPATSTSTGFGFGTSTGTANTLFGTAST<br>GTSLFSSQNNAFQNKPTGFGNFGTSTSSGGLF<br>GTTNTTSNPFGSTSGSLFGPCA   | Fuertes, et al. <i>PNAS</i> (2017) 114, E6342–E6351.                                                                                                                                                                                                                                     |
| Protein Phosphatase Inhibitor 2 | 34.6 |     | PIKGILKNKTSTTSSMVASAEQPRGNVDEELSKK<br>SQKWDEMNILATYHPADKDYGLMKIDEPSTPYH<br>SMMGDDEDACSDTEATEAMAPDILARKLAAAEG<br>LEPKYRIQE QESSGEEDSDLSPEREKQRQFEM<br>KRKLHYNEGLNIKLARQLISKDL | Marsh, J.A., Dancheck, B., Ragusa, M.J., Allaire, M., Forman-Kay, J.D., and Peti, W. (2010). Structural diversity in free and bound states of intrinsically disordered protein phosphatase 1 regulators. <i>Structure</i> 18, 1094–1103.                                                 |
| Nsp1                            | 41   | 3   | GCNFNTQQNKTPFSFGTANNNSNTTNQNSST<br>GAGAFGTGQSTFGFNNSAPNNTNANSSITPAF<br>GSNNTGNTAFGNSNPTSNVFGSNSTTNTFGSN<br>SAGTSLFGSSSAQQTKSNGTAGGNTFGSSSLFN                                 | Fuertes, et al. <i>PNAS</i> (2017) 114, E6342–E6351.                                                                                                                                                                                                                                     |

|                       |      |     |                                                                                                            |                                                                                                                                                                                                                                                                                                        |
|-----------------------|------|-----|------------------------------------------------------------------------------------------------------------|--------------------------------------------------------------------------------------------------------------------------------------------------------------------------------------------------------------------------------------------------------------------------------------------------------|
|                       |      |     | NSTNSNTTKPAFGGLNFGGGNNTTPSSTGNANT<br>SNNLFGATANANCA                                                        |                                                                                                                                                                                                                                                                                                        |
| IBB                   | 32   | 2   | GCTNENANTPAARLHRFKNKGKSTEMRRRIE<br>VNVELRKAKKDDQMLKRRNVSSFDDATSPLQE<br>NRNNQGTVNWSVDDIVKGINSSNVENQLQATCA   | Fuertes, et al. PNAS (2017)<br>114, E6342–E6351.                                                                                                                                                                                                                                                       |
| Ash1                  | 28.5 | 3.4 | GASASSPSPSTPTKSGKMRSRSSSPVRPKAYT<br>PSPRSPNYHRFALDSPQSPRRSSNSSITKKGS<br>RRSSGSSPTRHTTRVCV                  | Martin, E.W., Holehouse, A.S.,<br>Grace, C.R., Hughes, A.,<br>Pappu, R.V., and Mittag, T.<br>(2016). Sequence Determinants<br>of the Conformational<br>Properties of an Intrinsically<br>Disordered Protein Prior to and<br>upon Multisite Phosphorylation.<br>J. Am. Chem. Soc. 138, 15323–<br>15335. |
| pAsh1                 | 27.5 | 1.2 | GASASSPSPSTPTKSGKMRSRSSSPVRPKAYT<br>PSPRSPNYHRFALDSPQSPRRSSNSSITKKGS<br>RRSSGSSPTRHTTRVCV                  | Martin, E.W., Holehouse, A.S.,<br>Grace, C.R., Hughes, A.,<br>Pappu, R.V., and Mittag, T.<br>(2016). Sequence Determinants<br>of the Conformational<br>Properties of an Intrinsically<br>Disordered Protein Prior to and<br>upon Multisite Phosphorylation.<br>J. Am. Chem. Soc. 138, 15323–<br>15335. |
| PIR domain<br>(GRB14) | 27   |     | YGMQLYQNYMHPYQGRSGCSSQSISPMRSISE<br>NSLVAMDFSGQKSRVIENPTEALSVAVEEGLAW<br>RKKGCLRLGTHGSPTASSQSSATNMAIHRSQPW | Moncoq, K., Broutin, I.,<br>Craescu, C.T., Vachette, P.,<br>Ducruix, A., and Durand, D.<br>(2004). SAXS study of the PIR<br>domain from the Grb14<br>molecular adaptor: a natively<br>unfolded protein with a transient<br>structure primer? Biophys. J.<br>87, 4056–4064.                             |



|               |      |     |                                                                                                                                                                                                                                                                                                                                                         |                                                                                                                                                                                                                                                                                                                         |
|---------------|------|-----|---------------------------------------------------------------------------------------------------------------------------------------------------------------------------------------------------------------------------------------------------------------------------------------------------------------------------------------------------------|-------------------------------------------------------------------------------------------------------------------------------------------------------------------------------------------------------------------------------------------------------------------------------------------------------------------------|
| RplI215_gibbs | 28   | 0.7 | YSPGNAYSPSSSNYSNPNSPSYSPTSPSYSPSSP<br>SYSPTSPCYSPTSPSYSPSPNYTPVTPSYSPS<br>PNYSASPQ                                                                                                                                                                                                                                                                      | Gibbs, E.B., Lu, F., Portz, B.,<br>Fisher, M.J., Medellin, B.P.,<br>Laremore, T.N., Zhang, Y.J.,<br>Gilmour, D.S., and Showalter,<br>S.A. (2017). Phosphorylation<br>induces sequence-specific<br>conformational switches in the<br>RNA polymerase II C-terminal<br>domain. Nat. Commun. 8,<br>15233.                   |
| RplI215_portz | 51.8 |     | SPSYSPTSPNYTASSPGGASPNYSPSSPNYSPT<br>SPLYASPRYASTTPNFNPQSTGYSPSSSGYSPT<br>SPVYSPTVQFQSSPSFAGSGSNIYSPGNAYSPS<br>SSNYSNPNSPSYSPTSPSYSPSSPSYSPTSPCYS<br>PTSPSYSPSPNYTPVTPSYSPSPNYASPQYS<br>PASPAYSTGKYSPTSPSYSPSSPSYDGSPPG<br>PQYTPGSPQYSPASPKYSPTSPSYSPSSPQHSP<br>SNQYSPTGSTYSATSPRYSPNMSIYSPSSTKYSP<br>TSPTYTPTARNYSPTSPMYSPTAPSHYSPTSPAY<br>SPSSPTFEESD | Portz, B., Lu, F., Gibbs, E.B.,<br>Mayfield, J.E., Rachel<br>Mehaffey, M., Zhang, Y.J.,<br>Brodelt, J.S., Showalter, S.A.,<br>and Gilmour, D.S. (2017).<br>Structural heterogeneity in the<br>intrinsically disordered RNA<br>polymerase II C-terminal<br>domain. Nat. Commun. 8,<br>15231.                             |
| ACTR          | 25   |     | GPSGTQNRPLLRLNSLDDLVGPPSNLEGQSDERA<br>LLDQLHTLLSNTDATGLEEIDRALGIPELVNQQA<br>LEPKQDSGGPR                                                                                                                                                                                                                                                                 | Borgia, A., Zheng, W.,<br>Buholzer, K., Borgia, M.B.,<br>Schüler, A., Hofmann, H.,<br>Soranno, A., Nettels, D., Gast,<br>K., Grishaev, A., et al. (2016).<br>Consistent View of Polypeptide<br>Chain Expansion in Chemical<br>Denaturants from Multiple<br>Experimental Methods. J. Am.<br>Chem. Soc. 138, 11714–11726. |
| Msh6          | 56   | 2   | MAPATPKTSKTAHFENGSTSSQKKMKQSSLLSF<br>FSKQVPSGTPSKKVQKTPATLENTATDKITKNP<br>QGKGTGKLFVDVDEDNLTIAEETVSTVRSDIMH<br>SQEPQSDTMLNSNTEPKSTTTDEDLSSSQSRR<br>NHKRRVNYAESDDDDSDTTFTAKRKKGKVVDS<br>SDEDEYLPDKNDGDEDDDIADDDKEDIKGEAEDS<br>GDDDDLISLAETTSKKKFSYNTSHSSSPFTRNISR<br>DNSKKKSRPNQAPSRSYNPSHSQPSATSKSSKF                                                   | Shell, S.S., Putnam, C.D., and<br>Kolodner, R.D. (2007). The N<br>terminus of <i>Saccharomyces<br/>cerevisiae</i> Msh6 is an<br>unstructured tether to PCNA.<br>Mol. Cell 26, 565–578.                                                                                                                                  |

|           |      |     |                                                                                                                                                                                                       |                                                                                                                                                                                                                                                                                                              |
|-----------|------|-----|-------------------------------------------------------------------------------------------------------------------------------------------------------------------------------------------------------|--------------------------------------------------------------------------------------------------------------------------------------------------------------------------------------------------------------------------------------------------------------------------------------------------------------|
|           |      |     | NKQNEERYQWLVDERDAQRRPKSDPEYDPRTLYIP                                                                                                                                                                   |                                                                                                                                                                                                                                                                                                              |
| AN16      | 50   | 2   | AQTPSSQYGAPAQTPSSQYGAPAQTPSSQYGA<br>PAQTPSSQYGAPAQTPSSQYGAPAQTPSSQYGA<br>APAQTPSSQYGAPAQTPSSQYGAPAQTPSSQY<br>GAPAQTPSSQYGAPAQTPSSQYGAPAQTPSSQ<br>YGAPAQTPSSQYGAPAQTPSSQYGAPAQTPSS<br>QYGAPAQTPSSQYGAP | Nairn, K.M., Lyons, R.E., Mulder, R.J., Mudie, S.T., Cookson, D.J., Lesieur, E., Kim, M., Lau, D., Scholes, F.H., and Elvin, C.M. (2008). A synthetic resilin is largely unstructured. <i>Biophys. J.</i> 95, 3358–3365.                                                                                     |
| HrpO      | 35   |     | MEDTLEDDPQRAALEQVISLLTPVRQHRQASAE<br>RAHRHAQVELKSMLDHLKIRASLDQERDNHKKR<br>RREGLSQEHLKTIKSPNDIDRWHEKEKHMMLDRL<br>ACIRQDVQQQLRVAEQQALLEQKRLQAKASQR<br>AVEKLACMEETLNEEG                                  | Gazi, A.D., Bastaki, M., Charova, S.N., Gkougoulia, E.A., Kapellios, E.A., Panopoulos, N.J., and Kokkinidis, M. (2008). Evidence for a Coiled-coil Interaction Mode of Disordered Proteins from Bacterial Type III Secretion Systems. <i>J. Biol. Chem.</i> 283, 34062–34068.                                |
| alpha-syn | 41   | 1   | MDVFMKGLSKAKEGVVAAAETKQGVAAEAGK<br>TKEGVLYVGSKTKEGVVHG VATVAEKTKEQVTN<br>VGGAVVTGVTAVAQKTVEGAGSIAAATGFVKKD<br>QLGKNEEGAPQEGILEDMPVDPDNEAYEMPSEE<br>GYQDYEP EA                                         | Uversky, V.N., Li, J., Souillac, P., Millett, I.S., Doniach, S., Jakes, R., Goedert, M., and Fink, A.L. (2002). Biophysical properties of the synucleins and their propensities to fibrillate: inhibition of alpha-synuclein assembly by beta- and gamma-synucleins. <i>J. Biol. Chem.</i> 277, 11970–11978. |
| NTail     | 27.2 | 0.5 | TTEDKISRAVGPRQAQVSFLHGDQSENELPRLG<br>GKEDRRVKQSRGEARESYRETGPSRASDARAA<br>HLPTGTPLDIDTASESSQDPQDSRRSADALLRLQ<br>AMAGISEEQGSDTDTPIVYNDNRLLD                                                             | Longhi, S., Receveur-Bréchet, V., Karlin, D., Johansson, K., Darbon, H., Bhella, D., Yeo, R., Finet, S., and Canard, B. (2003). The C-terminal domain of the measles virus nucleoprotein is intrinsically disordered and folds upon                                                                          |

|                   |      |     |                                                                                                                                      |                                                                                                                                                                                                                                                                                                                            |
|-------------------|------|-----|--------------------------------------------------------------------------------------------------------------------------------------|----------------------------------------------------------------------------------------------------------------------------------------------------------------------------------------------------------------------------------------------------------------------------------------------------------------------------|
|                   |      |     |                                                                                                                                      | binding to the C-terminal moiety of the phosphoprotein. J. Biol. Chem. 278, 18638–18648.                                                                                                                                                                                                                                   |
| ERM               | 39.6 | 0.7 | MDGFYDQQVPMVPGKSRSEECRGRPVIDRKR<br>KFLDTDLAHDSEELFQDLSQLQEAWLAEAQVPD<br>DEQFVPDFQSDNLVHAPPPTKIKRELHSPSSEL<br>SSCSHEQALGANYGEKCLYNYCA | Lens, Z., Dewitte, F., Monté, D., Baert, J.-L., Bompard, C., Sénéchal, M., Van Lint, C., de Launoit, Y., Villeret, V., and Verger, A. (2010). Solution structure of the N-terminal transactivation domain of ERM modified by SUMO-1. Biochem. Biophys. Res. Commun. 399, 104–110.                                          |
| Neurologin-3      | 33   | 3   | YRKDKRRQEPLRQPSPQRGAGAPELGAAPEEE<br>LAALQLGPTHHECEAGPPHDTLRLTALPDYTLTL<br>RRSPDDIPLMTPNTITMIPNSLVGLQTLHPYNTFA<br>AGFNSTGLPHSHSTTRV   | Paz, A., Zeev-Ben-Mordehai, T., Lundqvist, M., Sherman, E., Mylonas, E., Weiner, L., Haran, G., Svergun, D.I., Mulder, F.A.A., Sussman, J.L., et al. (2008). Biophysical characterization of the unstructured cytoplasmic domain of the human neuronal adhesion protein neurologin 3. Biophys. J. 95, 1928–1944.           |
| Prothymosin alpha | 37.8 | 0.9 | MSDAAVDTSSSEITTKDLKEKKEVVEEAENGRDAP<br>ANGNAENEENGEQEADNEVDEEEEEEGEEEE<br>EEEGDGEEEDGDEDEEAESATGKRAAEDDEDD<br>DVDTKKKQKTDEDD         | Uversky, V.N., Gillespie, J.R., Millett, I.S., Khodyakova, A.V., Vasiliev, A.M., Chernovskaya, T.V., Vasilenko, R.N., Kozlovskaya, G.D., Dolgikh, D.A., Fink, A.L., et al. (1999). Natively Unfolded Human Prothymosin $\alpha$ Adopts Partially Folded Collapsed Conformation at Acidic pH. Biochemistry 38, 15009–15016. |
| Fez1              | 36   | 1   | QIQEEEEETLQDEEVWDALTDNYIPSLSEDWRDP<br>NIEALNGNCSDTEIHEKEEEEFNEKSENDSGINE                                                             | Alborghetti, M.R., Furlan, A.S., Silva, J.C., Paes Leme, A.F.,                                                                                                                                                                                                                                                             |

|            |      |      |                                                                                                                                                                                                                                                                                                                                                                                 |                                                                                                                                                                                                                                                                                                                                          |
|------------|------|------|---------------------------------------------------------------------------------------------------------------------------------------------------------------------------------------------------------------------------------------------------------------------------------------------------------------------------------------------------------------------------------|------------------------------------------------------------------------------------------------------------------------------------------------------------------------------------------------------------------------------------------------------------------------------------------------------------------------------------------|
|            |      |      | EPLLTADQVIEEIEEMMQNSPDPEEEEEVLEEED<br>GG                                                                                                                                                                                                                                                                                                                                        | Torriani, I.C.L., and Kobarg, J. (2010). Human FEZ1 Protein Forms a Disulfide Bond Mediated Dimer: Implications for Cargo Transport. <i>J. Proteome Res.</i> 9, 4595–4603.                                                                                                                                                               |
| HIV-TAT    | 33   | 1.05 | MEPVDPRLEPWKHPGSQPRTACTNCYCKKCCF<br>HCQVCFIRKALGISYGRKKRRRQRAPQDSETH<br>QVSPPKQPASQPRGDPTGPKESKKKVERETETH<br>PVN                                                                                                                                                                                                                                                                | Foucault, M., Mayol, K., Receveur-Bréchet, V., Bussat, M.-C., Klinguer-Hamour, C., Verrier, B., Beck, A., Haser, R., Gouet, P., and Guillon, C. (2010). UV and X-ray structural studies of a 101-residue long Tat protein from a HIV-1 primary isolate and of its mutated, detoxified, vaccine candidate. <i>Proteins</i> 78, 1441–1456. |
| p531-91    | 28.7 | 0.3  | MEEPQSDPSVEPPLSQETFSDLWKLLPENNVLS<br>PLPSQAMDDLMLSPDDIEQWFTEDPGPDEAPR<br>MPEAAPPVAPAAPPTPAAPAPAPSW                                                                                                                                                                                                                                                                              | Wells, M., Tidow, H., Rutherford, T.J., Markwick, P., Jensen, M.R., Mylonas, E., Svergun, D.I., Blackledge, M., and Fersht, A.R. (2008). Structure of tumor suppressor p53 and its intrinsically disordered N-terminal transactivation domain. <i>Proc. Natl. Acad. Sci. U. S. A.</i> 105, 5762–5767.                                    |
| Tau - ht40 | 65   | 3    | MAEPRQEFVEMEDHAGTYGLGDRKDQGGYTM<br>HQDQEGD TDAGLKESPLQTP TEDGSEEPGSETS<br>DAKSTPTAEDVTAPLVDEGAPGKQAAAQPHEIP<br>EGTTAEEAGIGDTPSLEDEAAGHVTQARMVSKS<br>KDGTGSDDKKAKGADGKTKIATPRGAAPPQKQK<br>QANATRIPAKTPPAPKTPPSSGEPPKSGDRSGY<br>SSPGSPGTPGSRSRTPSLPTPTREPKKVAVVR<br>TPPKSPSSAKSRLQTAPVMPDLKNVSKIGSTE<br>NLKHQPGGGKVQIINKKLDLSNVQSKCGSKDNIK<br>HVPGGGSVQIVYKPV DLSKVTSKCGSLGNIHHPK | E. Mylonas, A. Hascher, P. Bernado, M. Blackledge, E. Mandelkow and D. I. Svergun, <i>Biochemistry</i> , 2008, 47, 10345–10353.                                                                                                                                                                                                          |

|            |    |   |                                                                                                                                                                                                                                                                                                                                                                                                        |                                                                                                                          |
|------------|----|---|--------------------------------------------------------------------------------------------------------------------------------------------------------------------------------------------------------------------------------------------------------------------------------------------------------------------------------------------------------------------------------------------------------|--------------------------------------------------------------------------------------------------------------------------|
|            |    |   | GGGQVEVKSEKLDKDFKDRVQSKIGSLDNITHVPG<br>GGNKKIETHKLTFRENAKAKTDHGAEIVYKSPVV<br>SGDTSRHLNSVSSSTGSIDMVDSPQLATLADEV<br>SASLAKQGL                                                                                                                                                                                                                                                                            |                                                                                                                          |
| Tau - K32  | 42 | 3 | SSPGSPGTPGSRRTPSLPTPPTREPKKVAVVR<br>TPPKSPSSAKSRLQTAPVPMPDLKNVSKIGSTE<br>NLKHQPGGGKVQIINKLDLSNVQSKCGSKDNIK<br>HVPGGGSVQIVYKPVDSLKVTSKCGSLGNIHHKP<br>GGGQVEVKSEKLDKDFKDRVQSKIGSLDNITHVPG<br>GGNKKIETHKLTFRENAKAKTDHGAEIVY                                                                                                                                                                               | E. Mylonas, A. Hascher, P. Bernado', M. Blackledge, E. Mandelkow and D. I. Svergun, Biochemistry, 2008, 47, 10345-10353. |
| Tau - K16  | 39 | 3 | SSPGSPGTPGSRRTPSLPTPPTREPKKVAVVR<br>TPPKSPSSAKSRLQTAPVPMPDLKNVSKIGSTE<br>NLKHQPGGGKVQIINKLDLSNVQSKCGSKDNIK<br>HVPGGGSVQIVYKPVDSLKVTSKCGSLGNIHHKP<br>GGGQVEVKSEKLDKDFKDRVQSKIGSLDNITHVPG<br>GGNKKIE                                                                                                                                                                                                     | E. Mylonas, A. Hascher, P. Bernado', M. Blackledge, E. Mandelkow and D. I. Svergun, Biochemistry, 2008, 47, 10345-10353. |
| Tau - K18  | 38 | 3 | QTAPVPMPDLKNVSKIGSTENLKHQPGGGKVQ<br>IINKLDLSNVQSKCGSKDNIKHVPGGGSVQIVYK<br>PVDLSKVTSKCGSLGNIHHKPGGGQVEVKSEKL<br>DFKDRVQSKIGSLDNITHVPGGGNKKIE                                                                                                                                                                                                                                                            | E. Mylonas, A. Hascher, P. Bernado', M. Blackledge, E. Mandelkow and D. I. Svergun, Biochemistry, 2008, 47, 10345-10353. |
| Tau - ht23 | 53 | 3 | MAEPRQEFVEMEDHAGTYGLGDRKDQGGYTM<br>HQDQEGDTDAGLKAEEAGIGDTPSLEDEAAGHV<br>TQARMVSKSKDGTGSDDKKAKGADGKTKIATPR<br>GAAPPQKQGANATRIPAKTPPAPKTPPSSGEP<br>PKSGDRSGYSSPGSPGTPGSRRTPSLPTPPTR<br>EPKKVAVVRTPPKSPSSAKSRLQTAPVPMPDLK<br>NVKSKIGSTENLKHQPGGGKVQIVYKPVDSLKVT<br>SKCGSLGNIHHKPGGGQVEVKSEKLDKDFKDRVQS<br>KIGSLDNITHVPGGGNKKIETHKLTFRENAKAKTD<br>HGAEIVYKSPVSGDTSRHLNSVSSSTGSIDMVD<br>SPQLATLADEVASLAKQGL | E. Mylonas, A. Hascher, P. Bernado', M. Blackledge, E. Mandelkow and D. I. Svergun, Biochemistry, 2008, 47, 10345-10353. |
| Tau - K27  | 37 | 2 | SSPGSPGTPGSRRTPSLPTPPTREPKKVAVVR<br>TPPKSPSSAKSRLQTAPVPMPDLKNVSKIGSTE<br>NLKHQPGGGSVQIVYKPVDSLKVTSKCGSLGNIH                                                                                                                                                                                                                                                                                            | E. Mylonas, A. Hascher, P. Bernado', M. Blackledge, E. Mandelkow and D. I. Svergun,                                      |

|           |    |   |                                                                                                                                                                                                                                                                                                                       |                                                                                                                          |
|-----------|----|---|-----------------------------------------------------------------------------------------------------------------------------------------------------------------------------------------------------------------------------------------------------------------------------------------------------------------------|--------------------------------------------------------------------------------------------------------------------------|
|           |    |   | HKPGGGQVEVKSEKLDKDRVQSKIGSLDNITHV<br>PGGGNKKIETHKLTFRENAKAKTDHGAEIVY                                                                                                                                                                                                                                                  | Biochemistry, 2008, 47, 10345–10353.                                                                                     |
| Tau - K17 | 36 | 2 | SSPGSPGTPGSRRTPSLPTPTREPKKVAVVR<br>TPPKSPSSAKSRLQTAPVMPDLKNVSKIGSTE<br>NLKHQPGGGSVQIVYKPVDSLKVTSCGSLGNIH<br>HKPGGGQVEVKSEKLDKDRVQSKIGSLDNITHV<br>PGGGNKKIE                                                                                                                                                            | E. Mylonas, A. Hascher, P. Bernado´, M. Blackledge, E. Mandelkow and D. I. Svergun, Biochemistry, 2008, 47, 10345–10353. |
| Tau - K19 | 35 | 1 | QTAPVMPDLKNVSKIGSTENLKHQPGGGSVQ<br>IVYKPVDSLKVTSCGSLGNIHHKPGGGQVEVKS<br>EKLDKDRVQSKIGSLDNITHVPGGGNKKIE                                                                                                                                                                                                                | E. Mylonas, A. Hascher, P. Bernado´, M. Blackledge, E. Mandelkow and D. I. Svergun, Biochemistry, 2008, 47, 10345–10353. |
| Tau - K44 | 52 | 2 | MAEPRQEFVEMEDHAGTYGLGDRKDQGGYTM<br>HQDQEGDTDAGLKAEAEAGIGDTPSLEDEAAGHV<br>TQARMVSKSKDGTGSDDKKAKGADGKTKIATPR<br>GAAPPQKQGANATRIPAKTPPAPKTPPSSGEP<br>PKSGDRSGYSSPGSPGTPGSRRTPSLPTPPT<br>EPKKVAVVRTPPKSPSSAKSRLQTAPVMPDLK<br>NVKSKIGSTENLKHQPGGKQIVYKPVDSLKVT<br>SKCGSLGNIHHKPGGGQVEVKSEKLDKDRVQS<br>KIGSLDNITHVPGGGNKKIE | E. Mylonas, A. Hascher, P. Bernado´, M. Blackledge, E. Mandelkow and D. I. Svergun, Biochemistry, 2008, 47, 10345–10353. |
| Tau - K10 | 40 | 1 | QTAPVMPDLKNVSKIGSTENLKHQPGGGSVQ<br>IVYKPVDSLKVTSCGSLGNIHHKPGGGQVEVKS<br>EKLDKDRVQSKIGSLDNITHVPGGGNKKIETHK<br>LTFRENAKAKTDHGAEIVYKSPVSGDTSRHL<br>NVSSTGSIDMVDSPQLATLADEVASLAKQGL                                                                                                                                       | E. Mylonas, A. Hascher, P. Bernado´, M. Blackledge, E. Mandelkow and D. I. Svergun, Biochemistry, 2008, 47, 10345–10353. |
| Tau - K25 | 41 | 2 | MAEPRQEFVEMEDHAGTYGLGDRKDQGGYTM<br>HQDQEGDTDAGLKAEAEAGIGDTPSLEDEAAGHV<br>TQARMVSKSKDGTGSDDKKAKGADGKTKIATPR<br>GAAPPQKQGANATRIPAKTPPAPKTPPSSGEP<br>PKSGDRSGYSSPGSPGTPGSRRTPSLPTPPT<br>EPKKVAVVRTPPKSPSSAKSRL                                                                                                           | E. Mylonas, A. Hascher, P. Bernado´, M. Blackledge, E. Mandelkow and D. I. Svergun, Biochemistry, 2008, 47, 10345–10353. |

|                      |    |   |                                                                                                                                                                                                                                                                                                                                                                                                      |                                                                                                                          |
|----------------------|----|---|------------------------------------------------------------------------------------------------------------------------------------------------------------------------------------------------------------------------------------------------------------------------------------------------------------------------------------------------------------------------------------------------------|--------------------------------------------------------------------------------------------------------------------------|
| Tau - K23            | 49 | 2 | MAEPRQEFVEMEDHAGTYGLGDRKDQGGYTM<br>HQDQEGD TDAGLKAEEAGIGDTPSLEDEAAGHV<br>TQARMVSKSKDGTGSDDKKAKGADGKTKIATPR<br>GAAPPQKGGQANATRIPAKTPPAPKTPPSSGEP<br>PKSGDRSGYSSPGSPGTPGSRSRTPSLTPPTR<br>EPKKVAVVRTPPKSPSSAKSRLKKIETHKLTFRE<br>NAKAKTDHGAEIVYKSPVSGDTSRHLNSVSST<br>GSIDMVDSPQLATLADEVASLAKQGL                                                                                                          | E. Mylonas, A. Hascher, P. Bernado', M. Blackledge, E. Mandelkow and D. I. Svergun, Biochemistry, 2008, 47, 10345-10353. |
| Tau - K32 AT8 AT100  | 41 | 3 | SEPGEPGEPGSRREPELTPPTREPKKVAVVR<br>TPPKSPSSAKSRLQTAPVPMPDLKNVSKIGSTE<br>NLKHQPGGGKVQIINKLDLSNVQSKCGSKDNIK<br>HVPGGGSVQIVYKPVDSLKVTSCGSLGNIHHPK<br>GGGQVEVKSEKLDKDRVQSKIGSLDNITHVPG<br>GGNKKIETHKLTRENAKAKTDHGAEIVY                                                                                                                                                                                   | E. Mylonas, A. Hascher, P. Bernado', M. Blackledge, E. Mandelkow and D. I. Svergun, Biochemistry, 2008, 47, 10345-10353. |
| Tau - ht23 S214E     | 54 | 3 | MAEPRQEFVEMEDHAGTYGLGDRKDQGGYTM<br>HQDQEGD TDAGLKAEEAGIGDTPSLEDEAAGHV<br>TQARMVSKSKDGTGSDDKKAKGADGKTKIATPR<br>GAAPPQKGGQANATRIPAKTPPAPKTPPSSGEP<br>PKSGDRSGYSSPGSPGTPGSRSRTPPELTPPTR<br>EPKKVAVVRTPPKSPSSAKSRLQTAPVPMPDLK<br>NVKSKIGSTENLKHQPGGGKVQIVYKPVDSLKVT<br>SKCGSLGNIHHPKGGGQVEVKSEKLDKDRVQS<br>KIGSLDNITHVPGGGNKKIETHKLTRENAKAKTD<br>HGAEIVYKSPVSGDTSRHLNSVSSTGSIDMVD<br>SPQLATLADEVASLAKQGL | E. Mylonas, A. Hascher, P. Bernado', M. Blackledge, E. Mandelkow and D. I. Svergun, Biochemistry, 2008, 47, 10345-10353. |
| Tau - ht23 AT8 AT100 | 52 | 3 | MAEPRQEFVEMEDHAGTYGLGDRKDQGGYTM<br>HQDQEGD TDAGLKAEEAGIGDTPSLEDEAAGHV<br>TQARMVSKSKDGTGSDDKKAKGADGKTKIATPR<br>GAAPPQKGGQANATRIPAKTPPAPKTPPSSGEP<br>PKSGDRSGYSEPGEPGEPGSRREPELTPPTR<br>EPKKVAVVRTPPKSPSSAKSRLQTAPVPMPDLK<br>NVKSKIGSTENLKHQPGGGKVQIVYKPVDSLKVT<br>SKCGSLGNIHHPKGGGQVEVKSEKLDKDRVQS<br>KIGSLDNITHVPGGGNKKIETHKLTRENAKAKTD<br>HGAEIVYKSPVSGDTSRHLNSVSSTGSIDMVD<br>SPQLATLADEVASLAKQGL   | E. Mylonas, A. Hascher, P. Bernado', M. Blackledge, E. Mandelkow and D. I. Svergun, Biochemistry, 2008, 47, 10345-10353. |

|                                |      |      |                                                                                                                                                                                                                                                                                                                                                                                |                                                                                                                                                                                                                                    |
|--------------------------------|------|------|--------------------------------------------------------------------------------------------------------------------------------------------------------------------------------------------------------------------------------------------------------------------------------------------------------------------------------------------------------------------------------|------------------------------------------------------------------------------------------------------------------------------------------------------------------------------------------------------------------------------------|
| Tau - K18 P301L                | 35   | 2    | QTAPVPMPLDKNVSKIGSTENLKHQPGGGKVQ<br>IINKLDLSNVQSKCGSKDNIKHVLLGGGSVQIVYK<br>PVDLSKVTSKCGSLGNIHHKPGGGQVEVKSEKL<br>DFKDRVQSKIGSLDNITHVPGGGNKKIE                                                                                                                                                                                                                                   | E. Mylonas, A. Hascher, P. Bernado', M. Blackledge, E. Mandelkow and D. I. Svergun, <i>Biochemistry</i> , 2008, 47, 10345–10353.                                                                                                   |
| Tau - K18 ΔK280                | 79   | 10   | QTAPVPMPLDKNVSKIGSTENLKHQPGGGKVQ<br>IINKLDLSNVQSKCGSKDNIKHVLLGGGSVQIVYK<br>VDLSKVTSKCGSLGNIHHKPGGGQVEVKSEKLD<br>FKDRVQSKIGSLDNITHVPGGGNKKIE                                                                                                                                                                                                                                    | E. Mylonas, A. Hascher, P. Bernado', M. Blackledge, E. Mandelkow and D. I. Svergun, <i>Biochemistry</i> , 2008, 47, 10345–10353.                                                                                                   |
| Tau - K18 ΔK280<br>I277P I308P | 35   | 2    | QTAPVPMPLDKNVSKIGSTENLKHQPGGGKVQ<br>PINKLDLSNVQSKCGSKDNIKHVLLGGGSVQPVYK<br>PVDLSKVTSKCGSLGNIHHKPGGGQVEVKSEKL<br>DFKDRVQSKIGSLDNITHVPGGGNKKIE                                                                                                                                                                                                                                   | E. Mylonas, A. Hascher, P. Bernado', M. Blackledge, E. Mandelkow and D. I. Svergun, <i>Biochemistry</i> , 2008, 47, 10345–10353.                                                                                                   |
| Histatin                       | 13.2 | 0.01 | DSHAKRHHGYKRKFHEKHSHRGY                                                                                                                                                                                                                                                                                                                                                        | Cragnell, C., Durand, D., Cabane, B., and Skepö, M. (2016). Coarse-grained modeling of the intrinsically disordered protein Histatin 5 in solution: Monte Carlo simulations in combination with SAXS. <i>Proteins</i> 84, 777–791. |
| CortactinCR                    | 46.7 |      | GPLGSGYGGKFGVEQDRMDKSAVGHEYQSKLS<br>KHCSQVDSVRGFGGKFGVQMDRVDQSAVGFEY<br>QGKTEKHASQKDYSSGFGGKYGVQADRVDKSA<br>VGFQYQGKTEKHESQRDYSKGFGGKYGIDKDK<br>VDKSAVGFEYQGKTEKHESQKDYVKGFGGKFG<br>VQTDQRQDKCALGWDHQEKLQLHESQKDYKTGF<br>GGKFGVQSERQDSA AVGFDYKEKLAKHESQQD<br>YSKGFGGKYGVQKDRMDKNASTFEDVTQVSSA<br>YQKTVPVEAVTSKTSNIRANFENLAKEKEQEDRR<br>KAEAERAQRMARERQEQQEARRKLEEQARAKT<br>QT | Li, X., Tao, Y., Murphy, J.W., Scherer, A.N., Lam, T.T., Marshall, A.G., Koleske, A.J., and Boggon, T.J. (2017). The repeat region of cortactin is intrinsically disordered in solution. <i>Sci. Rep.</i> 7, 16696.                |



|                    |      |     |                                                                                                                                                                                                                                                                                                                                                                               |                                                                                                                                                                                                                                                                                   |
|--------------------|------|-----|-------------------------------------------------------------------------------------------------------------------------------------------------------------------------------------------------------------------------------------------------------------------------------------------------------------------------------------------------------------------------------|-----------------------------------------------------------------------------------------------------------------------------------------------------------------------------------------------------------------------------------------------------------------------------------|
| Pertactin-NTD      | 51.3 | 0.1 | DWNNQSIVKTGERQHGHIHQGSDPGGVRTASGT<br>TIKVSQRQAQGILLENPAEELQFRNGSVTSSGQL<br>SDDGIRRLGTVTVKAGKLVADHATLANVGDTW<br>DDDGIALYVAGEQAQASIADSTLQAGGVQIERG<br>ANVTVQRSAIVDGGHLIGALQSLQPEDLPPSRVV<br>LRDTNVTAVPASGAPAAVSVLGASELTLGGHIT<br>GGRAAGVAAMQGAHVHLQRATIRRGEALAGGA<br>VPGGAVPGGAVPGGFPGGFGPVLGWDGWDV<br>VSGSSVELAQSIPELGAIRVGRGARVTVPG<br>GSLSAPHGNIETGGARRFAPQAAPLSITLQAGA<br>H | Riback, J.A., Bowman, M.A., Zmyslowski, A.M., Knoverek, C.R., Jumper, J.M., Hinshaw, J.R., Kaye, E.B., Freed, K.F., Clark, P.L., and Sosnick, T.R. (2017). Innovative scattering analysis shows that hydrophobic disordered proteins are expanded in water. Science 358, 238–241. |
| Reduced_Rnase<br>H | 33.6 | 0.1 | KETAAAKFERQHMDSSSTAASSSNYCNQMMKS<br>RNLTKDRCKPVNTFVHESLADVQAVCSQKNVAC<br>KNGQTNCYQSYSTMSITDCRETGSSKYPNCAYK<br>TTQANKHIIVACEGNPYVPVHFDASV                                                                                                                                                                                                                                      | Riback, J.A., Bowman, M.A., Zmyslowski, A.M., Knoverek, C.R., Jumper, J.M., Hinshaw, J.R., Kaye, E.B., Freed, K.F., Clark, P.L., and Sosnick, T.R. (2017). Innovative scattering analysis shows that hydrophobic disordered proteins are expanded in water. Science 358, 238–241. |
| Nup1573_frag       | 24   | 5   | GCPSASPAFGANQTPTFGQSQGASQPNPPGFSI<br>SSSTALFPTGSQPAPPTFGTVSSSSQPPVFGQQ<br>PSQSAFGSTTPNA                                                                                                                                                                                                                                                                                       | Mercadante, D., Milles, S., Fuertes, G., Svergun, D.I., Lemke, E.A., and Gräter, F. (2015). Kirkwood-Buff Approach Rescues Overcollapse of a Disordered Protein in Canonical Protein Force Fields. J. Phys. Chem. B 119, 7975–7984.                                               |
| LOX-PP             | 37   | 0.4 | APPAAGQQQPPREPPAAPGAWRQQIQWENNG<br>QVFSLLSLGSYQPPRRRDPGAAPGAANASA<br>QQPRTPILLIRDNRATAARTRTAGSSGVTAGRPR<br>PTARHWFQAGYSTSRAREAGASRAENQTAPGE<br>VPALSNLRPPSRVDGMVG                                                                                                                                                                                                             | Vallet, S.D., Miele, A.E., Uciechowska-Kaczmarzyk, U., Liwo, A., Duclos, B., Samsonov, S.A., and Ricard-Blum, S. (2018). Insights into the structure and dynamics of lysyl oxidase propeptide, a                                                                                  |

|              |      |     |                                                                                                                         |                                                                                                                                                                                                                              |
|--------------|------|-----|-------------------------------------------------------------------------------------------------------------------------|------------------------------------------------------------------------------------------------------------------------------------------------------------------------------------------------------------------------------|
|              |      |     |                                                                                                                         | flexible protein with numerous partners. Sci. Rep. 8, 11768.                                                                                                                                                                 |
| H1_CTD       | 25   | 0.2 | KGDEPKRSVAFKKTKEVKKVATPKKAAKPKKA<br>ASKAPSKPKATPVKKAKKKPAATPKKAKKPKVV<br>KVKPVKASKPKKAKTVKPKAKSSAKRASKKK                | Roque, A., Ponte, I., and Suau, P. (2007). Macromolecular crowding induces a molten globule state in the C-terminal domain of histone H1. Biophys. J. 93, 2170–2177.                                                         |
| p27_WT (v31) | 28.1 | 1.8 | GSHMKGACKVPAQESQDVSGSRPAAPLIGAPAN<br>SEDTHLVDPKTDPSDSQTGLAEQCAGIRKRPAT<br>DDSSTQNKRANRTEENVSDGSPNAGSVEQTPK<br>KPGLRRRQT | Das, R.K., Huang, Y., Phillips, A.H., Kriwacki, R.W., and Pappu, R.V. (2016). Cryptic sequence features within the disordered protein p27Kip1 regulate cell cycle signaling. Proc. Natl. Acad. Sci. U. S. A. 113, 5616–5621. |
| p27_v14      | 29.4 | 1.3 | GSHMKGACKSSPPSNDQGRPGDPKQVIDKTE<br>VERTQDTSNIQETQSANNSGPDKPSRCDLAVSG<br>VAAAALPAPGHANSTARDLTRDEEAGSVEQTPK<br>KPGLRRRQT  | Das, R.K., Huang, Y., Phillips, A.H., Kriwacki, R.W., and Pappu, R.V. (2016). Cryptic sequence features within the disordered protein p27Kip1 regulate cell cycle signaling. Proc. Natl. Acad. Sci. U. S. A. 113, 5616–5621. |
| p27_v15      | 29.2 | 1   | GSHMKGACIVANSPPDDVKSKEVPQTDPRLTG<br>GDRDNARASRTGNDPAGASTQSAEVACSNPILS<br>TPDAQEKQAGTSNSKERPHEQLSAGSVEQTPKK<br>PGLRRRQT  | Das, R.K., Huang, Y., Phillips, A.H., Kriwacki, R.W., and Pappu, R.V. (2016). Cryptic sequence features within the disordered protein p27Kip1 regulate cell cycle signaling. Proc. Natl. Acad. Sci. U. S. A. 113, 5616–5621. |
| p27_v44      | 24.9 | 1.3 | GSHMKGACRKPANAEADSSSCQNVPRGKSKQA<br>PETPTGSPLGDATLNQVKPRRPSSASTNIGQLED                                                  | Das, R.K., Huang, Y., Phillips, A.H., Kriwacki, R.W., and Pappu, R.V. (2016). Cryptic                                                                                                                                        |

|                       |      |     |                                                                                                                                                                                                                                                                                                                                       |                                                                                                                                                                                                                                                 |
|-----------------------|------|-----|---------------------------------------------------------------------------------------------------------------------------------------------------------------------------------------------------------------------------------------------------------------------------------------------------------------------------------------|-------------------------------------------------------------------------------------------------------------------------------------------------------------------------------------------------------------------------------------------------|
|                       |      |     | ADEDDAEDHVGSVAVTSQTIPNDRAGSVEQTPKK<br>PGLRRRQT                                                                                                                                                                                                                                                                                        | sequence features within the disordered protein p27Kip1 regulate cell cycle signaling. Proc. Natl. Acad. Sci. U. S. A. 113, 5616–5621.                                                                                                          |
| p27_v56               | 23.3 | 1   | GSHMKGACGSSVLGTGNPRNQAHVSDTSLEED<br>DDEQDDSTPDEVSAQACTIVASALDINAATPRSPK<br>ASPKRKRKRQSTAPAQGNPPGNAGSVEQTPK<br>KPGLRRRQT                                                                                                                                                                                                               | Das, R.K., Huang, Y., Phillips, A.H., Kriwacki, R.W., and Pappu, R.V. (2016). Cryptic sequence features within the disordered protein p27Kip1 regulate cell cycle signaling. Proc. Natl. Acad. Sci. U. S. A. 113, 5616–5621.                    |
| p27_v78               | 22.1 | 0.3 | GSHMKGACALPSGVVPAEDDDDEEEEDDQDP<br>AQPQAVQGAAPSSGTNNSQPILPSIAVNSTTGPN<br>STAGKKRKRRRRTRHSNCATLSSAGSVEQTPKK<br>PGLRRRQT                                                                                                                                                                                                                | Das, R.K., Huang, Y., Phillips, A.H., Kriwacki, R.W., and Pappu, R.V. (2016). Cryptic sequence features within the disordered protein p27Kip1 regulate cell cycle signaling. Proc. Natl. Acad. Sci. U. S. A. 113, 5616–5621.                    |
| Ki-1/57               | 47   | 2   | PRRGEQQGWNSDRGPEGMLERAERRSYREYR<br>PYETERQADFTAEEKFPDEKPGDRFDRDRPLRGR<br>GGPRGGMRGRGRGGPGNRVDFDAFDQRGKREF<br>ERYGGNDKIAVRTEDNMGCGVRTWGSKGKDS<br>DVEPTAPMEEPTVVEESQGTPEEESPAKVPELE<br>VEEETQVQEMTLDEWKNLQEQTRPKPEFNIRKP<br>ESTVPSKAVVIHKSRYRDDMVKDDYEDDSHVFR<br>KPANDITSQLEINFGNLPRPGRGARGGTRGGRG<br>RIRRAENYGPRAEVVMQDVAPNPDDPEDFPALS | Bressan, G.C., Silva, J.C., Borges, J.C., Dos Passos, D.O., Ramos, C.H.I., Torriani, I.L., and Kobarg, J. (2008). Human regulatory protein Ki-1/57 has characteristics of an intrinsically unstructured protein. J. Proteome Res. 7, 4465–4474. |
| CTCF-R domain<br>(WT) | 32.5 | 1.8 | SAERRNSILTETLHRFSLEGDAPVSWTETKKQSF<br>KQTGEFGEKRKNSILNPINSIRKFSIVQKTPLQMN<br>GIEEDSDEPLERRLSLVPDSEQGEAILPRISVIST<br>GPTLQARRRQSVLNLMTHSVNQGNHRKTTAS<br>TRKVSLAPQANLTELDIYSRRLSQETGLEISEEIN<br>EEDLKECFDDME                                                                                                                            | Marasini, C., Galeno, L., and Moran, O. (2013). A SAXS-based ensemble model of the native and phosphorylated regulatory domain of the CFTR. Cell. Mol. Life Sci. 70, 923–933.                                                                   |

|                                   |      |     |                                                                                                                                                                                                             |                                                                                                                                                                                                                                                                                                              |
|-----------------------------------|------|-----|-------------------------------------------------------------------------------------------------------------------------------------------------------------------------------------------------------------|--------------------------------------------------------------------------------------------------------------------------------------------------------------------------------------------------------------------------------------------------------------------------------------------------------------|
| CTCF-R domain<br>(phosphorylated) | 29.2 | 0.4 | SAERRNSILTETLHRFSLEGDAPVSWTETKKQSF<br>KQTGEFGEKRKNSILNPINSIRKFSIVQKTPLQMN<br>GIEEDSDEPLERRLSLVPDSEQGEAILPRISVIST<br>GPTLQARRRQSVLNLMTHSVNNQGNHRKTTAS<br>TRKVSLAPQANLTELDIYSRRLSQETGLEISEEIN<br>EEDLKECFDDME | Marasini, C., Galeno, L., and Moran, O. (2013). A SAXS-based ensemble model of the native and phosphorylated regulatory domain of the CFTR. <i>Cell. Mol. Life Sci.</i> 70, 923–933.                                                                                                                         |
| hNHE1cdt                          | 37.5 | 0   | VPAHKLDSPTMSRARIGSDPLAYEPKEDLPVITID<br>PASPQSPESVDLVNEELKGVGLSRDPAKVAE<br>EDEDGIMMRSKETSSPGTDDVFTPAPSDSP<br>SSQRIQRCLSDPGPHPEPGEPEFFPKGQ                                                                    | Kjaergaard, M., Nørholm, A.-B., Hendus-Altenburger, R., Pedersen, S.F., Poulsen, F.M., and Kragelund, B.B. (2010). Temperature-dependent structural changes in intrinsically disordered proteins: Formation of $\alpha$ -helices or loss of polyproline II? <i>Protein Sci.</i> 19, 1555–1564.               |
| pMBP                              | 54   | 0   | ASQKRPSQRHGSKYLASASTMDHARHGFLPRH<br>RDTGIDSLGRFFGADRGPARGSGKDGHHAAR<br>TTHYGSLPQKAQHGRPDENPVVHFFKNIVTPR<br>TPPPSQGKGRGLSLRFSWGAEGQKPGFGYGG<br>RAPDYKPAHKGLKGAQDAQGTLKIFKLGRDS<br>RSGSPMARR                  | Majava, V., Wang, C., Myllykoski, M., Kangas, S.M., Kang, S.U., Hayashi, N., Baumgärtel, P., Heape, A.M., Lubec, G., and Kursula, P. (2010). Structural analysis of the complex between calmodulin and full-length myelin basic protein, an intrinsically disordered molecule. <i>Amino Acids</i> 39, 59–71. |
| HMPV                              | 27.4 | 0.5 | MSFPEGKDILFMGNEAAKLAEAFQKSLRKPSHK<br>RSQSIIGEKVNTVSETLELPTISRPTKP                                                                                                                                           | Renner, M., Paesen, G.C., Grison, C.M., Granier, S., Grimes, J.M., and Leyrat, C. (2017). Structural dissection of human metapneumovirus phosphoprotein using small angle x-ray scattering. <i>Sci. Rep.</i> 7, 14865.                                                                                       |

|                         |      |     |                                                                                                                                                                      |                                                                                                                                                                                                                                                                                                                                  |
|-------------------------|------|-----|----------------------------------------------------------------------------------------------------------------------------------------------------------------------|----------------------------------------------------------------------------------------------------------------------------------------------------------------------------------------------------------------------------------------------------------------------------------------------------------------------------------|
| redAFP                  | 22.2 | 0.1 | CKGADGAHGVNGCPGTAGAAGSVGGPGCDGG<br>HGGNGGNPNPGCAGGVGGAGGASGGTGVGG<br>RGGKGGSGTPKGADGAPGAP                                                                            | Gates, Z.P., Baxa, M.C., Yu, W., Riback, J.A., Li, H., Roux, B., Kent, S.B.H., and Sosnick, T.R. (2017). Perplexing cooperative folding and stability of a low-sequence complexity, polyproline 2 protein lacking a hydrophobic core. Proc. Natl. Acad. Sci. U. S. A. 114, 2241–2246.                                            |
| CSD1 (with overhang)    | 35.4 | 0   | MAMITNSSSVPAESKSSKPSGKSDMDAALDDLID<br>TLGGPEETEEDNTTYTGPEVLDPMSSTYIEELGK<br>REVTLPKYRELLDKKEGIPVPPDTSKPLGPDD<br>AIDALSLDLTCSPTADGKKTEKEKSTGEVLKAAQ<br>SVGVIKSDPLESLN | Konno, T., Tanaka, N., Kataoka, M., Takano, E., and Maki, M. (1997). A circular dichroism study of preferential hydration and alcohol effects on a denatured protein, pig calpastatin domain I. Biochim. Biophys. Acta 1342, 73–82.                                                                                              |
| PAGE4_WT                | 36.2 | 1.1 | MSARVRSRSRGRGDGQEAPDVVAFVAPGESQQ<br>EEPPTDNQDIEPGQEREGTPPIEERKVEGDCQE<br>MDLEKTRSERGDGSDVKEKTPPNPKHAKTKEAG<br>DGQP                                                   | Kulkarni, P., Jolly, M.K., Jia, D., Mooney, S.M., Bhargava, A., Kagohara, L.T., Chen, Y., Hao, P., He, Y., Veltri, R.W., et al. (2017). Phosphorylation-induced conformational dynamics in an intrinsically disordered protein and potential role in phenotypic heterogeneity. Proc. Natl. Acad. Sci. U. S. A. 114, E2644–E2653. |
| PAGE4_WT_phosphorylated | 49.8 | 1.9 | MSARVRSRSRGRGDGQEAPDVVAFVAPGESQQ<br>EEPPTDNQDIEPGQEREGTPPIEERKVEGDCQE<br>MDLEKTRSERGDGSDVKEKTPPNPKHAKTKEAG<br>DGQP                                                   | Kulkarni, P., Jolly, M.K., Jia, D., Mooney, S.M., Bhargava, A., Kagohara, L.T., Chen, Y., Hao, P., He, Y., Veltri, R.W., et al. (2017). Phosphorylation-induced conformational dynamics in an intrinsically disordered protein and potential                                                                                     |

|                |       |      |                                                                                                                                                                                                                   |                                                                                                                                                                                                                                                                                                                               |
|----------------|-------|------|-------------------------------------------------------------------------------------------------------------------------------------------------------------------------------------------------------------------|-------------------------------------------------------------------------------------------------------------------------------------------------------------------------------------------------------------------------------------------------------------------------------------------------------------------------------|
|                |       |      |                                                                                                                                                                                                                   | role in phenotypic heterogeneity. Proc. Natl. Acad. Sci. U. S. A. 114, E2644–E2653.                                                                                                                                                                                                                                           |
| ERalpha-NTD    | 31    | 0.2  | SNAMTMTLHTKASGMALLHQIQGNELEPLNRPQ<br>LKIPLERPLGEVYLDSSKPAVYNYPEGAAAYEFNA<br>AAAANAQVYGGTGLPYGPGSEAAAFGSNGLGG<br>FPPLNSVSPSPLMLLHPPPQLSPFLQPHGQQVP<br>YYLENEPSGYTVREAGPPAFYRPNSDNRRQGG<br>RERLASTNDKGSMMAMESAKETRY | Peng, Y., Cao, S., Kiselar, J., Xiao, X., Du, Z., Hsieh, A., Ko, S., Chen, Y., Agrawal, P., Zheng, W., Shi, W., Jiang, W., Yang, L., Chance, M. R., Surewicz, W. K., Buck, M., & Yang, S. (2019). A Metastable Contact and Structural Disorder in the Estrogen Receptor Transactivation Domain. Structure, 27(2), 229–240.e4. |
| A1-LCD-NLS     | 27.6  | 0.16 | GSMASASSSQRGRSGSGNFGGGRGGGFGGND<br>NFGRGGNFSGRGGFGGSRGGGGYGGSGDGY<br>NGFGNDGSNFGGGGSYNDFGNYNNQSSNFGP<br>MKGGNFGGRSSGGSGGGGQYFAKPRNQGGYG<br>GSSSSSSYGSRRF                                                          | Bremer, A., Farag, M., Borchers, W. M., Peran, I., Martin, E. W., Pappu, R. V., & Mittag, T. (2022). Deciphering how naturally occurring sequence features impact the phase behaviours of disordered prion-like domains. Nature Chemistry, 14(2), 196–207.                                                                    |
| A1-LCD+NLS     | 25.83 | 0.11 | GSMASASSSQRGRSGSGNFGGGRGGGFGGND<br>NFGRGGNFSGRGGFGGSRGGGGYGGSGDGY<br>NGFGNDGSNFGGGGSYNDFGNYNNQSSNFGP<br>MKGGNFGGRSSGPYGGGGQYFAKPRNQGGYG<br>GSSSSSSYGSRRF                                                          | Bremer, A., Farag, M., Borchers, W. M., Peran, I., Martin, E. W., Pappu, R. V., & Mittag, T. (2022). Deciphering how naturally occurring sequence features impact the phase behaviours of disordered prion-like domains. Nature Chemistry, 14(2), 196–207.                                                                    |
| A1-LCD-12F+12Y | 26.04 | 0.2  | GSMASASSSQRGRSGSGNYGGGRGGGYGGND<br>NYGRGGNYSGRGGYGGSRGGGGYGGSGDGY<br>NGYGNDGSNYGGGGSYNDYGNYYNNQSSNYGP                                                                                                             | Bremer, A., Farag, M., Borchers, W. M., Peran, I., Martin, E. W., Pappu, R. V., & Mittag, T. (2022). Deciphering                                                                                                                                                                                                              |

|              |       |      |                                                                                                                                                           |                                                                                                                                                                                                                                                            |
|--------------|-------|------|-----------------------------------------------------------------------------------------------------------------------------------------------------------|------------------------------------------------------------------------------------------------------------------------------------------------------------------------------------------------------------------------------------------------------------|
|              |       |      | MKGGNYGGRSSGGSGGGGQYYAKPRNQGGY<br>GGSSSSSSYGSGRRY                                                                                                         | how naturally occurring sequence features impact the phase behaviours of disordered prion-like domains. Nature Chemistry, 14(2), 196–207.                                                                                                                  |
| A1-LCD+7F-7Y | 27.18 | 0.13 | GSMASASSSQRGRSGSGNFGGGRGGGFGGND<br>NFRGGRGNFSGRGGFGGSRGGGGFGGSGDGFN<br>GFGNDGSNFGGGGSFNDFGNFNQSSNFGPM<br>KGGNFGGRSSGGSGGGGQFFAKPRNQGGFGG<br>SSSSSSFGSGRRF | Bremer, A., Farag, M., Borchers, W. M., Peran, I., Martin, E. W., Pappu, R. V., & Mittag, T. (2022). Deciphering how naturally occurring sequence features impact the phase behaviours of disordered prion-like domains. Nature Chemistry, 14(2), 196–207. |
| A1-LCD-9F+6Y | 26.55 | 0.1  | GSMASASSSQRGRSGSGNFGGGRGGGYGGND<br>NYGRGGNYSRGGFGGSRGGGGYGGSGDGY<br>NNGGNDGSNYGGGGSYNDSGNYNNQSSNFGP<br>MKGGNYGGRSSGGSGGGGQYGAKPRNQGGY<br>GGSSSSSSYGSGRRY  | Bremer, A., Farag, M., Borchers, W. M., Peran, I., Martin, E. W., Pappu, R. V., & Mittag, T. (2022). Deciphering how naturally occurring sequence features impact the phase behaviours of disordered prion-like domains. Nature Chemistry, 14(2), 196–207. |
| A1-LCD-8F+4Y | 27.07 | 0.07 | GSMASASSSQRGRSGSGNFGGGRGGGYGGND<br>NGGRGGNYSRGGFGGSRGGGGYGGSGDGY<br>NNGGNDGSNYGGGGSYNDSGNYNNQSSNFGP<br>MKGGNYGGRSSGGSGGGGQYGAKPRNQGGY<br>GGSSSSSSYGSGRRF  | Bremer, A., Farag, M., Borchers, W. M., Peran, I., Martin, E. W., Pappu, R. V., & Mittag, T. (2022). Deciphering how naturally occurring sequence features impact the phase behaviours of disordered prion-like domains. Nature Chemistry, 14(2), 196–207. |
| A1-LCD-9F+3Y | 26.83 | 0.13 | GSMASASSSQRGRSGSGNFGGGRGGGYGGND<br>NGGRGGNYSRGGFGGSRGGGGYGGSGDGY<br>NNGGNDGSNYGGGGSYNDSGNNGNNQSSNFGP                                                      | Bremer, A., Farag, M., Borchers, W. M., Peran, I., Martin, E. W., Pappu, R. V., & Mittag, T. (2022). Deciphering how naturally occurring                                                                                                                   |

|            |       |      |                                                                                                                                                         |                                                                                                                                                                                                                                                            |
|------------|-------|------|---------------------------------------------------------------------------------------------------------------------------------------------------------|------------------------------------------------------------------------------------------------------------------------------------------------------------------------------------------------------------------------------------------------------------|
|            |       |      | MKGGNYGGRSSGGSGGGGQYGAKPRNQGGY<br>GGSSSSSSYGSGRRS                                                                                                       | sequence features impact the phase behaviours of disordered prion-like domains. Nature Chemistry, 14(2), 196–207.                                                                                                                                          |
| A1-LCD-10R | 26.71 | 0.07 | GSMASASSSQGGSSGSGNFGGGGGGGFGGND<br>NFGGGGNFSGSGGFGGSGGGGGYGGSGDGY<br>NGFGNDGSNFGGGGSYNDFGNYNQSSNFGP<br>MKGGNFGGSSSGPYGGGGQYFAKPGNQGGY<br>GSSSSSSYGSGGGF | Bremer, A., Farag, M., Borchers, W. M., Peran, I., Martin, E. W., Pappu, R. V., & Mittag, T. (2022). Deciphering how naturally occurring sequence features impact the phase behaviours of disordered prion-like domains. Nature Chemistry, 14(2), 196–207. |
| A1-LCD-6R  | 25.73 | 0.09 | GSMASASSSQGGRSGSGNFGGGRGGGFGGND<br>NFGGGGNFSGSGGFGGSRGGGGYGGSGDGY<br>NGFGNDGSNFGGGGSYNDFGNYNQSSNFGP<br>MKGGNFGGSSSGPYGGGGQYFAKPGNQGGY<br>GSSSSSSYGSGGRF | Bremer, A., Farag, M., Borchers, W. M., Peran, I., Martin, E. W., Pappu, R. V., & Mittag, T. (2022). Deciphering how naturally occurring sequence features impact the phase behaviours of disordered prion-like domains. Nature Chemistry, 14(2), 196–207. |
| A1-LCD+2R  | 26.23 | 0.23 | GSMASASSQRGRSGSGNFGGGRGGGFGGND<br>NFGRRGNFSGRRGFGGSRGGGGYGGSGDGY<br>NGFRNDGSNFGGGGRYNDFGNYNQSSNFGP<br>MKGGNFGGRSSGPYGGGGQYFAKPRNQGGY<br>GSSSSSSYGSGRRF  | Bremer, A., Farag, M., Borchers, W. M., Peran, I., Martin, E. W., Pappu, R. V., & Mittag, T. (2022). Deciphering how naturally occurring sequence features impact the phase behaviours of disordered prion-like domains. Nature Chemistry, 14(2), 196–207. |
| A1-LCD+7R  | 27.09 | 0.07 | GSMASASSQRGRSGRGNFGGGRGGGFGGND<br>NFGRRGNFSGRRGFGGSRGGGRYGGSGDRYN<br>GFGNDGRNFGGGGSYNDFGNYNQSSNFGPM<br>KGGNFRGRSSGPYGRGGQYFAKPRNQGGYGG<br>SSSSRSYGSGRRF | Bremer, A., Farag, M., Borchers, W. M., Peran, I., Martin, E. W., Pappu, R. V., & Mittag, T. (2022). Deciphering how naturally occurring sequence features impact the                                                                                      |



|                |       |      |                                                                                                                                                           |                                                                                                                                                                                                                                                            |
|----------------|-------|------|-----------------------------------------------------------------------------------------------------------------------------------------------------------|------------------------------------------------------------------------------------------------------------------------------------------------------------------------------------------------------------------------------------------------------------|
|                |       |      |                                                                                                                                                           | phase behaviours of disordered prion-like domains. Nature Chemistry, 14(2), 196–207.                                                                                                                                                                       |
| A1-LCD-3R+3K   | 26.34 | 0.15 | GSMASASSSQRGKSGSGNFGGGRGGGFGGND<br>NFGRRGNFSGRGGFGGSKGGGGYGGSGDGYN<br>GFGNDGSNFGGGGSYNDFGNYNQSSNFGPM<br>KGGNFGGRSSGGSGGGGQYFAKPRNQGGYGG<br>SSSSSSYGSGRKF  | Bremer, A., Farag, M., Borchers, W. M., Peran, I., Martin, E. W., Pappu, R. V., & Mittag, T. (2022). Deciphering how naturally occurring sequence features impact the phase behaviours of disordered prion-like domains. Nature Chemistry, 14(2), 196–207. |
| A1-LCD-6R+6K   | 27.87 | 0.08 | GSMASASSSQKKGKSGSGNFGGGRGGGFGGND<br>NFGKGGNFSGRGGFGGSKGGGGYGGSGDGYN<br>GFGNDGSNFGGGGSYNDFGNYNQSSNFGPM<br>KGGNFGGKSSGGSGGGGQYFAKPRNQGGYGG<br>SSSSSSYGSGRKF | Bremer, A., Farag, M., Borchers, W. M., Peran, I., Martin, E. W., Pappu, R. V., & Mittag, T. (2022). Deciphering how naturally occurring sequence features impact the phase behaviours of disordered prion-like domains. Nature Chemistry, 14(2), 196–207. |
| A1-LCD-10R+10K | 28.49 | 0.05 | GSMASASSSQKKGKSGSGNFGGKGGGFGGND<br>NFGKGGNFSGKGGFGGSKGGGGYGGSGDGYN<br>GFGNDGSNFGGGGSYNDFGNYNQSSNFGPM<br>KGGNFGGKSSGGSGGGGQYFAKPNQGGYGG<br>SSSSSSYGSGKKF   | Bremer, A., Farag, M., Borchers, W. M., Peran, I., Martin, E. W., Pappu, R. V., & Mittag, T. (2022). Deciphering how naturally occurring sequence features impact the phase behaviours of disordered prion-like domains. Nature Chemistry, 14(2), 196–207. |
| A1-LCD-4D      | 26.42 | 0.12 | GSMASASSQRRSGSGNFGGGRGGGFGGNG<br>NFGRRGNFSGRGGFGGSRGGGGYGGSGGGY<br>NGFGNSGSNFGGGGSYNDFGNYNQSSNFGP<br>MKGGNFGGRSSGPYGGGGQYFAKPRNQGGY<br>GSSSSSSYGSGRRF     | Bremer, A., Farag, M., Borchers, W. M., Peran, I., Martin, E. W., Pappu, R. V., & Mittag, T. (2022). Deciphering how naturally occurring sequence features impact the phase behaviours of disordered                                                       |

|            |       |      |                                                                                                                                                           |                                                                                                                                                                                                                                                            |
|------------|-------|------|-----------------------------------------------------------------------------------------------------------------------------------------------------------|------------------------------------------------------------------------------------------------------------------------------------------------------------------------------------------------------------------------------------------------------------|
|            |       |      |                                                                                                                                                           | prion-like domains. Nature Chemistry, 14(2), 196–207.                                                                                                                                                                                                      |
| A1-LCD+4D  | 27.18 | 0.3  | GSMASASSSQDRDRSGSGNFGGGRGGGFGGND<br>NFRGGRGNFSGRGDFGGSRRGGGYGGSGDGYN<br>GFGNDGSNFGGGGSYNDGNYNNQSSNFGPM<br>KGGNFGGRSSDPYGGGGQYFAKPRNQGGYGG<br>SSSSSYDSGRRF | Bremer, A., Farag, M., Borchers, W. M., Peran, I., Martin, E. W., Pappu, R. V., & Mittag, T. (2022). Deciphering how naturally occurring sequence features impact the phase behaviours of disordered prion-like domains. Nature Chemistry, 14(2), 196–207. |
| A1-LCD+8D  | 26.85 | 0.07 | GSMASASSSQDRDRSGSGNFGGGRDGGFGGND<br>NFRGGRGNFSGRGDFGGSRDGGGYGGSGDGYN<br>GFGNDGSNFGGGGSYNDGNYNNQSSNFGPM<br>KGGNFGGRSSDPYGGGGQYFAKPRNQDGYGG<br>SSSSSYDSGRRF | Bremer, A., Farag, M., Borchers, W. M., Peran, I., Martin, E. W., Pappu, R. V., & Mittag, T. (2022). Deciphering how naturally occurring sequence features impact the phase behaviours of disordered prion-like domains. Nature Chemistry, 14(2), 196–207. |
| A1-LCD+12D | 28.01 | 0.12 | GSMASADSSQDRDRDDSGNFGDGRGGGFGGND<br>NFRGGRGNFSDRGGFGGSRGDGGYGGDGDGYN<br>GFGNDGSNFGGGGSYNDGNYNNQSSNFDPM<br>KGGNFGDRSSGPYDGGGQYFAKPRNQGGYGG<br>SSSSSYGSDRRF | Bremer, A., Farag, M., Borchers, W. M., Peran, I., Martin, E. W., Pappu, R. V., & Mittag, T. (2022). Deciphering how naturally occurring sequence features impact the phase behaviours of disordered prion-like domains. Nature Chemistry, 14(2), 196–207. |
| A1-LCD+12E | 28.52 | 0.05 | GSMASAESSQREERESGNFGEGRGGGFGGND<br>NFRGGRGNFSERGGFGGSREGGYGGEGDGYN<br>GFGNDGSNFGGGGSYNDGNYNNQSSNFPEM<br>KGGNFGERSGYPYEGGGQYFAKPRNQGGYGG<br>SSSSSYGSERRF   | Bremer, A., Farag, M., Borchers, W. M., Peran, I., Martin, E. W., Pappu, R. V., & Mittag, T. (2022). Deciphering how naturally occurring sequence features impact the phase behaviours of disordered                                                       |

|                     |       |      |                                                                                                                                                         |                                                                                                                                                                                                                                                            |
|---------------------|-------|------|---------------------------------------------------------------------------------------------------------------------------------------------------------|------------------------------------------------------------------------------------------------------------------------------------------------------------------------------------------------------------------------------------------------------------|
|                     |       |      |                                                                                                                                                         | prion-like domains. Nature Chemistry, 14(2), 196–207.                                                                                                                                                                                                      |
| A1-LCD+7R+10D       | 29.21 | 0.08 | GSMASADSSQRDRDGRGNFGDGRGGGFGGND<br>NFRGGNFSDRGGFGGSRGGGRYGGDGDRYN<br>GFGNDGRNFGGGGSYNDGNYNNQSSNFDPM<br>KGGNFRDRSSGPYDRGGQYFAKPRNQGGYGG<br>SSSSRSYGSDRRF | Bremer, A., Farag, M., Borchers, W. M., Peran, I., Martin, E. W., Pappu, R. V., & Mittag, T. (2022). Deciphering how naturally occurring sequence features impact the phase behaviours of disordered prion-like domains. Nature Chemistry, 14(2), 196–207. |
| A1-LCD+7K+12Dblocky | 25.62 | 0.14 | GSMASAKSSQRDRDDGNGFKGRGGGFGGNK<br>NFRGGNFSSKRGFGGSRGKGYGGKGGDDYN<br>GFGNDGDNFGGGGSYNDGNYNNQSSNFDPM<br>DGGNFDDRSSGPYDDGGQYFADPRNQGGYGG<br>SSSSKSYGSKRRF  | Bremer, A., Farag, M., Borchers, W. M., Peran, I., Martin, E. W., Pappu, R. V., & Mittag, T. (2022). Deciphering how naturally occurring sequence features impact the phase behaviours of disordered prion-like domains. Nature Chemistry, 14(2), 196–207. |
| A1-LCD-12F+12Y10R   | 26.07 | 0.2  | GSMASASSSQGGSSGSGNYGGGGGGGYGGN<br>DNYGGGNYSGSGGYGGSGGGGYGGSGDG<br>YNGYNDGNSNYGGGSYNDYGNYNQSSNYG<br>PMKGGNYGSSSGPYGGGQYYAKPGNQGGY<br>GGSSSSSYGSGGGY      | Bremer, A., Farag, M., Borchers, W. M., Peran, I., Martin, E. W., Pappu, R. V., & Mittag, T. (2022). Deciphering how naturally occurring sequence features impact the phase behaviours of disordered prion-like domains. Nature Chemistry, 14(2), 196–207. |
| A1-LCD10F+7R+12D    | 28.6  | 0.04 | GSMASADSSQRDRDDRGNFGRGGGGGGGN<br>DNFRGGNGSDRGGGGSRGDGRYGGDGDR<br>YNGGGNDGRNGGGGSYNDGGNYNNQSSNG<br>DPMKGGNGRDRSSGPYDRGGQYGAKPRNQGG<br>YGGSSSSRSYGSDRRG   | Bremer, A., Farag, M., Borchers, W. M., Peran, I., Martin, E. W., Pappu, R. V., & Mittag, T. (2022). Deciphering how naturally occurring sequence features impact the phase behaviours of disordered                                                       |

|       |       |      |                                                                                                                                                                                                                                                                                                                                                                                                    |                                                                                                                                                                                                                                                                                  |
|-------|-------|------|----------------------------------------------------------------------------------------------------------------------------------------------------------------------------------------------------------------------------------------------------------------------------------------------------------------------------------------------------------------------------------------------------|----------------------------------------------------------------------------------------------------------------------------------------------------------------------------------------------------------------------------------------------------------------------------------|
|       |       |      |                                                                                                                                                                                                                                                                                                                                                                                                    | prion-like domains. Nature Chemistry, 14(2), 196–207.                                                                                                                                                                                                                            |
| Pnt   | 51.1  | 0.13 | DWNNQSIVKTGERQHGIHIQGS DPGGVRTASGT<br>TIKVSGRQAQGILLENPAAELQFRNGSVTSSGQL<br>SDDGIRRLGTVTVKAGKLVADHATLANVGDTW<br>DDDGIALYVAGEQAQASIADSTLQGAGGVQIERG<br>ANVTVQRSAIVDGGHLHIGALQSLQPEDLPPSRVV<br>LRDTNVTAVPASGAPAAVSVLGASELTDGGHIT<br>GGRAAGVAAMQGA VVHLQRATIRRGEALAGGA<br>VPGGAVP GGAVP GGF GPGGFGPVL D GWYGV D<br>VSGSSVELAQSIVEAPELGA AIRVGRGARVTVPG<br>GSL SAPHGNVIETGGARRFAPQAAPLSITLQAGA<br>H    | Bowman, M. A., Riback, J. A., Rodriguez, A., Guo, H., Li, J., Sosnick, T. R., & Clark, P. L. (2020). Properties of protein unfolded states suggest broad selection for expanded conformational ensembles. Proceedings of the National Academy of Sciences, 117(38), 23356–23364. |
| Swap1 | 49.2  | 0.59 | DWNNQSIVKTGERQHGIHIQGS DPGGVRTASGT<br>TIKVSGRQAQGILLENPAAELQFRNGSVTSSGQK<br>SDDGIRRLGTVTVLAGKLVADHATLANVGDTW<br>DDDGIALYVAGEQAQASIADSTLQGAGGVQIERG<br>ANVTVQRSAIVLGGHLHIGALQSLQPEDDPPSRVV<br>LRDTNVTAVPASGAPAAVSVLGASLLTDGGHIT<br>GGRAAGVAAMQGA VVHEQRATIRRGEALAGGA<br>VPGGAVP GGAVP GGF GPGGFGPVL D GWYGV D<br>VSGSSVELAQSIVEAPELGA AIRVGRGARVTVPG<br>GSL SAPHGNVIETGGARRFAPQAAPLSITLQAGA<br>H    | Bowman, M. A., Riback, J. A., Rodriguez, A., Guo, H., Li, J., Sosnick, T. R., & Clark, P. L. (2020). Properties of protein unfolded states suggest broad selection for expanded conformational ensembles. Proceedings of the National Academy of Sciences, 117(38), 23356–23364. |
| Swap3 | 40.58 | 1.07 | DWNNQSIVKTGERQHGIHIQGS DPGGVRTASGT<br>TIKVSGRQAQGILLENPAAELQFRNGSVTSSGQK<br>STDGTRRFLGDVIVKAGLLVADHATLANVGDTW<br>DDDGIALYVAGEQAQASIADSTLQGAGGVQIERG<br>ANVDVLR LAIVDGGHLHIGALQSQQPETSPPSRVV<br>LRDTNVTAVPASGAPAAVSVQGASEQTL DGGAI<br>TGGRAAGVAAMLGHVVHLLRATIRRGEALAGGA<br>VPGGAVP GGAVP GGF GPGGFGPVL D GWYGV D<br>VSGSSVELAQSIVEAPELGA AIRVGRGARVTVPG<br>GSL SAPHGNVIETGGARRFAPQAAPLSITLQAGA<br>H | Bowman, M. A., Riback, J. A., Rodriguez, A., Guo, H., Li, J., Sosnick, T. R., & Clark, P. L. (2020). Properties of protein unfolded states suggest broad selection for expanded conformational ensembles. Proceedings of the National Academy of Sciences, 117(38), 23356–23364. |
| Swap4 | 53.37 | 0.17 | DWNNQSIVKTGERQHGIHIQGS DPGGVRTASGT<br>TIKVSGRQAQGILLENPAAELQFRNGSVTSSGQL                                                                                                                                                                                                                                                                                                                           | Bowman, M. A., Riback, J. A., Rodriguez, A., Guo, H., Li, J.,                                                                                                                                                                                                                    |

|         |       |      |                                                                                                                                                                                                                                                                                                                                                                                                       |                                                                                                                                                                                                                                                                                  |
|---------|-------|------|-------------------------------------------------------------------------------------------------------------------------------------------------------------------------------------------------------------------------------------------------------------------------------------------------------------------------------------------------------------------------------------------------------|----------------------------------------------------------------------------------------------------------------------------------------------------------------------------------------------------------------------------------------------------------------------------------|
|         |       |      | SFVGITRDLGRD TVKAGKLVADHATLANVGDTW<br>DDDGIALYVAGEQAQASIADSTLQGAGGVQIERG<br>ADVRVQREAVDGG LHN GALQSLQPSILPPSTVV<br>LRDTNVTAVPASGAPAAVLVSGASGLRLDGGHI<br>HEGRAAGVAAMQGA VVTLQTATIRRGEALAGGA<br>VPGGAVP GGAVP GGF GPGGF GPVLDGWYGV D<br>VSGSSVELAQ SIVEAPELGA AIRVGRGARVTVPG<br>GSL SAPHGNVIETGGARRFAPQAAPLSITLQAGA<br>H                                                                                | Sosnick, T. R., & Clark, P. L. (2020). Properties of protein unfolded states suggest broad selection for expanded conformational ensembles. Proceedings of the National Academy of Sciences, 117(38), 23356–23364.                                                               |
| Swap4.1 | 54.45 | 0.14 | DWNNQSIVKTGERQHGIHIQGS DPGGVRTASGT<br>TIK VSGRQAQGILLENPAAELQFRNGSVTSSGQL<br>SFVGITRRLGDDTVKAGKLVADHATLANVGDTW<br>DDDGIALYVAGEQAQASIADSTLQGAGGVQIERG<br>ADVEVQRRRAIVDGG LHN GALQSLQPSILPPSTVV<br>LRDTNVTAVPASGAPAAVLVSGASGLELDGGHIH<br>RGRAAGVAAMQGA VVTLQTATIRRGEALAGGAV<br>P GGAVP GGAVP GGF GPGGF GPVLDGWYGV DV<br>SGSSVELAQ SIVEAPELGA AIRVGRGARVTVPGG<br>SLSAPHGNVIETGGARRFAPQAAPLSITLQAGAH      | Bowman, M. A., Riback, J. A., Rodriguez, A., Guo, H., Li, J., Sosnick, T. R., & Clark, P. L. (2020). Properties of protein unfolded states suggest broad selection for expanded conformational ensembles. Proceedings of the National Academy of Sciences, 117(38), 23356–23364. |
| Swap5   | 48.71 | 0.34 | DWNNQSIVKTGERQHGIHIQGS DPGGVRTASGT<br>TIK VSGRQAQGILLENPAAELQFRNGSVTSSGQL<br>SDDGIEDFLGT VTV DAGELVADHATLANVGDTW<br>DDDGIALYVAGEQAQASIADSTLQGAGGVQIEDG<br>ANVTVQESAIVDGG LHN GALQSLQPRRLPPSRVV<br>LRKTNVTAVPASGAPAAVSVLGASKLTLRGGHIT<br>GGRAAGVAAMQGA VVHLQRATIRRGRALAGGA<br>VPGGAVP GGAVP GGF GPGGF GPVLDGWYGV D<br>VSGSSVELAQ SIVEAPELGA AIRVGRGARVTVPG<br>GSL SAPHGNVIETGGARRFAPQAAPLSITLQAGA<br>H | Bowman, M. A., Riback, J. A., Rodriguez, A., Guo, H., Li, J., Sosnick, T. R., & Clark, P. L. (2020). Properties of protein unfolded states suggest broad selection for expanded conformational ensembles. Proceedings of the National Academy of Sciences, 117(38), 23356–23364. |
| Swap6   | 52.61 | 0.27 | DWNNQSIVKTGERQHGIHIQGS DPGGVRTASGT<br>TIK VSGRQAQGILLENPAAELQFRNGSVTSSGQL<br>SDRGIDRFLGT VTV EAGKLVADHATLANVGDTW<br>DKDGIALYVAGRQAQASIADSTLQGAGGVQIREG<br>ANVTVQRSAIVDGG LHN GALQSLQPERLPPSDVV<br>LRDTNVTAVPASGAPAAVSVLGASRLTLDGGHIT<br>GGDAAGVAAMQGA VVHLQRATIERGEALAGGA<br>VPGGAVP GGAVP GGF GPGGF GPVLDGWYGV D<br>VSGSSVELAQ SIVEAPELGA AIRVGRGARVTVPG                                             | Bowman, M. A., Riback, J. A., Rodriguez, A., Guo, H., Li, J., Sosnick, T. R., & Clark, P. L. (2020). Properties of protein unfolded states suggest broad selection for expanded conformational ensembles. Proceedings of the National                                            |

|            |       |      |                                                                                                             |                                                                                                                                                                                                                                                                                                                                                                              |
|------------|-------|------|-------------------------------------------------------------------------------------------------------------|------------------------------------------------------------------------------------------------------------------------------------------------------------------------------------------------------------------------------------------------------------------------------------------------------------------------------------------------------------------------------|
|            |       |      | GSLSAPHGNVIETGGARRFAPQAAPLSITLQAGA<br>H                                                                     | Academy of Sciences, 117(38),<br>23356–23364.                                                                                                                                                                                                                                                                                                                                |
| sfAFP      | 23.1  | 2    | CKGADGAHGVNGCPGTAGAAAGSVGGPGCDGG<br>HGGNGGNGNPGCAGGVGGAGGASGGTGVGG<br>RGGKGGSGTPKGADGAPGAP                  | Gates ZP, Baxa MC, Yu W,<br>Riback JA, Li H, Roux B, et al.<br>Perplexing cooperative folding<br>and stability of a low-sequence<br>complexity, polyproline 2<br>protein lacking a hydrophobic<br>core. Proc Natl Acad Sci U S A.<br>2017;114: 2241–2246.                                                                                                                    |
| FCP1       | 15.6  | 0.12 | ESSRESSNEDEGSSSEADEMAKALEAELNDLM                                                                            | Gibbs, Eric B., and Scott A.<br>Showalter. 2016.<br>“Quantification of Compactness<br>and Local Order in the<br>Ensemble of the Intrinsically<br>Disordered Protein FCP1.” The<br>Journal of Physical Chemistry.<br>B 120 (34): 8960–69.                                                                                                                                     |
| RS-peptide | 12.62 | 0.07 | MYRSRSRSRSRSRSRSRS                                                                                          | <b>SAXS data – NMR data -<br/>Xiang, S., Gapsys, V., Kim,<br/>H.-Y., Bessonov, S., Hsiao,<br/>H.-H., Möhlmann, S.,<br/>Klaukien, V., Ficner, R.,<br/>Becker, S., Urlaub, H.,<br/>Lührmann, R., de Groot, B., &amp;<br/>Zweckstetter, M. (2013).<br/>Phosphorylation drives a<br/>dynamic switch in<br/>serine/arginine-rich proteins.<br/>Structure , 21(12), 2162–2174.</b> |
| P1_100     | 29    | 0    | MAEEQARHVKNGLECIKALKAEPISLAIEEAMA<br>AWSEISDNPGQERATCREEKAGSSGLSKPCLSA<br>IGSTEGGAPRIRGQGPGESDDDAETLGIPPRNL | Naudi-Fabra, S., Tengo, M.,<br>Jensen, M. R., Blackledge, M.,<br>& Milles, S. (2021). Quantitative<br>Description of Intrinsically<br>Disordered Proteins Using<br>Single-Molecule FRET, NMR,<br>and SAXS. Journal of the                                                                                                                                                    |

|          |       |      |                                                                                                                                                                                                                                                                                                                                                                                                       |                                                                                                                                                                                                                                                                                                                                                                              |
|----------|-------|------|-------------------------------------------------------------------------------------------------------------------------------------------------------------------------------------------------------------------------------------------------------------------------------------------------------------------------------------------------------------------------------------------------------|------------------------------------------------------------------------------------------------------------------------------------------------------------------------------------------------------------------------------------------------------------------------------------------------------------------------------------------------------------------------------|
|          |       |      |                                                                                                                                                                                                                                                                                                                                                                                                       | American Chemical Society, 143(48), 20109–20121.                                                                                                                                                                                                                                                                                                                             |
| DSS1     | 25    | 0.1  | MSRAALPSLENLEDDDEFEDFATENWPMKDTEL<br>DTGDDTLWENNWDEDEDIGDDDFSVQLQAELKK<br>KGVAAC                                                                                                                                                                                                                                                                                                                      | Pesce, F., Newcombe, E. A., Seiffert, P., Tranchant, E. E., Olsen, J. G., Grace, C. R., Kragelund, B. B., & Lindorff-Larsen, K. (2022). Assessment of models for calculating the hydrodynamic radius of intrinsically disordered proteins. <i>Biophysical Journal</i> .<br><a href="https://doi.org/10.1016/j.bpj.2022.12.013">https://doi.org/10.1016/j.bpj.2022.12.013</a> |
| GHR_ICD  | 59.59 | 0.38 | SKQQRIMLILPPVVPKIKGIDPDLLKEGKLEEV<br>NTILAIHDSYKPEFHSDDSWVEFIELDIDEPEKT<br>EESDTRLLSSDHEKSHSNLGVKDGDSGRTSCC<br>EPDILETDFNANDIHEGTSEVAQPQRLKGEADLL<br>CLDQKNQNNSPYHDACPATQQPSVIAEKKNKPKQ<br>PLPTEGAESTHQAHHIQLSNPSSLSNIDFYAQVS<br>DITPAGSVVLSPGQKNKAGMSQCDMHPPEMVSL<br>CQENFLMDNAYFCEADAKKCI PVAPHIKVESHQ<br>PSLNQEDIYITTESLTTAAGRPGTGEHVPGSEMP<br>VPDYTSIHIVQSPQGLILNATALPLPDKEFLSSCG<br>YVSTDQLNKIMP | Pesce, F., Newcombe, E. A., Seiffert, P., Tranchant, E. E., Olsen, J. G., Grace, C. R., Kragelund, B. B., & Lindorff-Larsen, K. (2022). Assessment of models for calculating the hydrodynamic radius of intrinsically disordered proteins. <i>Biophysical Journal</i> .<br><a href="https://doi.org/10.1016/j.bpj.2022.12.013">https://doi.org/10.1016/j.bpj.2022.12.013</a> |
| NHE6cmdd | 32    | 0.2  | GPPLTTTLPACCGPIARCLTSPQAYENQEQLKDD<br>DSDLILNDGDISLTYGDSTVNTEPATSSAPRRFM<br>GNSSDALDRELAFGDHEL VIRGTRLVLPMDSS<br>EPPLNLLDNTRHGPA                                                                                                                                                                                                                                                                      | Pesce, F., Newcombe, E. A., Seiffert, P., Tranchant, E. E., Olsen, J. G., Grace, C. R., Kragelund, B. B., & Lindorff-Larsen, K. (2022). Assessment of models for calculating the hydrodynamic radius of intrinsically disordered proteins. <i>Biophysical Journal</i> .<br><a href="https://doi.org/10.1016/j.bpj.2022.12.013">https://doi.org/10.1016/j.bpj.2022.12.013</a> |
| ANAC046  | 36    | 0.3  | NAPSTTITTTKQLSRIDSLDNIDHLLDFSSLPPLID<br>PGFLGQPGPSFSGARQQHDLKPVLLHPTTAPVD                                                                                                                                                                                                                                                                                                                             | Pesce, F., Newcombe, E. A., Seiffert, P., Tranchant, E. E.,                                                                                                                                                                                                                                                                                                                  |

|                    |      |     |                                                                                                                                                       |                                                                                                                                                                                                                                                                                                                  |
|--------------------|------|-----|-------------------------------------------------------------------------------------------------------------------------------------------------------|------------------------------------------------------------------------------------------------------------------------------------------------------------------------------------------------------------------------------------------------------------------------------------------------------------------|
|                    |      |     | NTYLPTQALNFPYHSVHNSGSDFGYGAGSGNN<br>NKGMIKLEHSLVSVSQETGLSSDVNTTATPEISS<br>YPMMPAMPMDGSKSACDGLDDLIFWEDLYTS                                             | Olsen, J. G., Grace, C. R., Kragelund, B. B., & Lindorff-Larsen, K. (2022). Assessment of models for calculating the hydrodynamic radius of intrinsically disordered proteins. <i>Biophysical Journal</i> .<br><a href="https://doi.org/10.1016/j.bpj.2022.12.013">https://doi.org/10.1016/j.bpj.2022.12.013</a> |
| stath_NTD          | 9.1  | 0.3 | DSSEKFLRRIGRFG                                                                                                                                        | Rieloff, E., & Skepö, M. (2020). Phosphorylation of a disordered peptide—Structural effects and force field inconsistencies. <i>Journal of Chemical Theory and Computation</i> .<br><a href="https://pubs.acs.org/doi/abs/10.1021/acs.jctc.9b01190">https://pubs.acs.org/doi/abs/10.1021/acs.jctc.9b01190</a>    |
| A1_Aro_minus       | 27.9 | 0.8 | GSMASASSSQRGRSGNSGGRRGGGFGGND<br>NFRGGNSSGRGGFGGSRGGGGYGGSGDGY<br>NGFGNDGSNSGGGSSNDFGNYNNQSSNFGP<br>MKGGNFGGRSSGGSGGGGQYSAKPRNQGGY<br>GGSSSSSSSGSRRF  | Martin, E. W., Holehouse, A. S., Peran, I., Farag, M., Incicco, J. J., Bremer, A., Grace, C. R., Soranno, A., Pappu, R. V., & Mittag, T. (2020). Valence and patterning of aromatic residues determine the phase behavior of prion-like domains. <i>Science</i> , 367(6478), 694–699.                            |
| A1_Aro_minus_minus | 29.3 | 0.5 | GSMASASSSQRGRSGNSGGRRGGGFGGND<br>NSGRGGNSSGRGGFGGSRGGGGSGGSGDGY<br>NGSGNDGSNSGGGSSNDFGNSNNQSSNSGP<br>MKGGNFGGRSSGGSGGGGQYSAKPRNQGGG<br>GGSSSSSSSGSRRS | Martin, E. W., Holehouse, A. S., Peran, I., Farag, M., Incicco, J. J., Bremer, A., Grace, C. R., Soranno, A., Pappu, R. V., & Mittag, T. (2020). Valence and patterning of aromatic residues determine the phase behavior of prion-like domains. <i>Science</i> , 367(6478), 694–699.                            |
| A1_Aro_plus        | 24.2 | 1.5 | GSMFASSSQRGRYGSNFGGRRGGGFGGND<br>NFRGGNFSGRGGFGGSRGGGGYGGSGDGY                                                                                        | Martin, E. W., Holehouse, A. S., Peran, I., Farag, M., Incicco, J.                                                                                                                                                                                                                                               |



|                              |    |   |                                                                                                                                                |                                                                                                                                                                                                                                                                                                                                                                                                                               |
|------------------------------|----|---|------------------------------------------------------------------------------------------------------------------------------------------------|-------------------------------------------------------------------------------------------------------------------------------------------------------------------------------------------------------------------------------------------------------------------------------------------------------------------------------------------------------------------------------------------------------------------------------|
|                              |    |   | NGFGNDGSNFGGGGSYNDFGNYNQSSNFGP<br>MKGGNFGGRSSGGSYGGGQYFAKPRNQGGYG<br>GSSFSSSYGSGRRF                                                            | J., Bremer, A., Grace, C. R., Soranno, A., Pappu, R. V., & Mittag, T. (2020). Valence and patterning of aromatic residues determine the phase behavior of prion-like domains. <i>Science</i> , 367(6478), 694–699.                                                                                                                                                                                                            |
| HeV_PNT3_CTD<br>_200_254     | 28 | 0 | MSYYHHHHHLESTSLYKKAGFTPTEPPVIPEY<br>YYGSGRRGDLSKSPPRGNVNLDSIKIYTSDDDEDE<br>NQLEYEDEF                                                           | Nilsson, J. F., Baroudi, H., Gondelaud, F., Pesce, G., Bignon, C., Ptchelkine, D., Chamieh, J., Cottet, H., Kajava, A. V., & Longhi, S. (2022). Molecular Determinants of Fibrillation in a Viral Amyloidogenic Domain from Combined Biochemical and Biophysical Studies. <i>International Journal of Molecular Sciences</i> , 24(1). <a href="https://doi.org/10.3390/ijms24010399">https://doi.org/10.3390/ijms24010399</a> |
| HeV_PNT3_200_<br>310_YYY_AAA | 40 | 0 | MSYYHHHHHLESTSLYKKAGFTPTEPPVIPEA<br>AAGSGRRGDLSKSPPRGNVNLDSIKIYTSDDDEDE<br>NQLEYEDEFKSSSEVVIDTTPEDNDSINQEEVV<br>GDPDQGLEHPFPLGKFPEKEETPDVRRKDS | Nilsson, J. F., Baroudi, H., Gondelaud, F., Pesce, G., Bignon, C., Ptchelkine, D., Chamieh, J., Cottet, H., Kajava, A. V., & Longhi, S. (2022). Molecular Determinants of Fibrillation in a Viral Amyloidogenic Domain from Combined Biochemical and Biophysical Studies. <i>International Journal of Molecular Sciences</i> , 24(1). <a href="https://doi.org/10.3390/ijms24010399">https://doi.org/10.3390/ijms24010399</a> |
| HeV_PNT3_200_<br>310_WT      | 37 | 0 | MSYYHHHHHLESTSLYKKAGSTPTEPPVIPEY<br>YYGSGRRGDLSKSPPRGNVNLDSIKIYTSDDDEDE<br>NQLEYEDEFKSSSEVVIDTTPEDNDSINQEEVV<br>GDPDQGLEHPFPLGKFPEKEETPDVRRKDS | Nilsson, J. F., Baroudi, H., Gondelaud, F., Pesce, G., Bignon, C., Ptchelkine, D., Chamieh, J., Cottet, H., Kajava,                                                                                                                                                                                                                                                                                                           |

|                     |    |   |                                                                                                                                                                |                                                                                                                                                                                                                                                                                                                                                                                                                             |
|---------------------|----|---|----------------------------------------------------------------------------------------------------------------------------------------------------------------|-----------------------------------------------------------------------------------------------------------------------------------------------------------------------------------------------------------------------------------------------------------------------------------------------------------------------------------------------------------------------------------------------------------------------------|
|                     |    |   |                                                                                                                                                                | A. V., & Longhi, S. (2022).<br>Molecular Determinants of Fibrillation in a Viral Amyloidogenic Domain from Combined Biochemical and Biophysical Studies. International Journal of Molecular Sciences, 24(1).<br><a href="https://doi.org/10.3390/ijms24010399">https://doi.org/10.3390/ijms24010399</a>                                                                                                                     |
| NiV_PNT3_200_314_WT | 37 | 0 | MSYYHHHHHLESTSLYKKAGFDPKADSPVIAE<br>HYYGLGVKEQNVGPQTSRNVNLDSEIKLYTSDDE<br>EADQLEFEDEFAGSSSEVIVGISPEDEEPSVGG<br>KPNESIGRTIEGQSIRDNLQAKDNKSTDVPGAGP<br>KDS       | Nilsson, J. F., Baroudi, H., Gondelaud, F., Pesce, G., Bignon, C., Ptchelkine, D., Chamieh, J., Cottet, H., Kajava, A. V., & Longhi, S. (2022).<br>Molecular Determinants of Fibrillation in a Viral Amyloidogenic Domain from Combined Biochemical and Biophysical Studies. International Journal of Molecular Sciences, 24(1).<br><a href="https://doi.org/10.3390/ijms24010399">https://doi.org/10.3390/ijms24010399</a> |
| red1_288_345        | 25 | 0 | GAMGISLPLLKQDDWLSSSKPFGSSTPNVVEIFD<br>SDDDGDDFSNSKIEQSNLEKPPSSENSEGGSHHH<br>HHH                                                                                | TBD                                                                                                                                                                                                                                                                                                                                                                                                                         |
| p150L_342_475       | 41 | 0 | MAERLGKQLKRAEREEKEKLKEEAKRAKEEAK<br>KKKEEEKELKEKERREKREKDEKEKAQRLKE<br>ERRKERQEALAEKLEEKRKKEEEKRLREEEKRIK<br>AEKAEITRFFQKPKTPQAPKTLAGSCGKFAPFEIK<br>ELEHHHHHHH | Gopinathan Nair, A., Rabas, N., Lejon, S., Homiski, C., Osborne, M. J., Cyr, N., Sverzhinsky, A., Melendy, T., Pascal, J. M., Laue, E. D., Borden, K. L. B., Omichinski, J. G., & Verreault, A. (2022).<br>Unorthodox PCNA Binding by Chromatin Assembly Factor 1. International Journal of Molecular Sciences, 23(19).                                                                                                     |

|               |    |   |                                                                                                                                                                                                                                                                                       |                                                                                                                                                                                                                                                                                                                                                                                                                                                                                                        |
|---------------|----|---|---------------------------------------------------------------------------------------------------------------------------------------------------------------------------------------------------------------------------------------------------------------------------------------|--------------------------------------------------------------------------------------------------------------------------------------------------------------------------------------------------------------------------------------------------------------------------------------------------------------------------------------------------------------------------------------------------------------------------------------------------------------------------------------------------------|
|               |    |   |                                                                                                                                                                                                                                                                                       | <a href="https://doi.org/10.3390/ijms231911099">https://doi.org/10.3390/ijms231911099</a>                                                                                                                                                                                                                                                                                                                                                                                                              |
| E1A_2022      | 36 | 0 | GSM SHFEPPTLHELVDLDTAPEDPNEEAVSQIF<br>PDSVMLAVQEGIDLLTFPPAPGSPEPPHLSRQPE<br>QPEQRALGPVSMPNLVPEVIDLYCYEQLNPPSD<br>DEDEEGEEFVLDY                                                                                                                                                        | González-Foutel, N. S., Glavina, J., Borchers, W. M., Safranchik, M., Barrera-Vilarmau, S., Sagar, A., Estaña, A., Barozet, A., Garrone, N. A., Fernandez-Ballester, G., Blanes-Mira, C., Sánchez, I. E., de Prat-Gay, G., Cortés, J., Bernadó, P., Pappu, R. V., Holehouse, A. S., Daughdrill, G. W., & Chemes, L. B. (2022). Conformational buffering underlies functional selection in intrinsically disordered protein regions. <i>Nature Structural &amp; Molecular Biology</i> , 29(8), 781–790. |
| RelA_TAD      | 27 | 0 | MGSVPKPAPQPYTFPASLSTINFDEFSPMLLPSG<br>QISNQALALAPSSAPVLAQTMVPSSAMVPLAQQP<br>APAPVLTPGPPQSL SAPVPKSTQAGEGTLSEALL<br>HLQFDADEDLGALLGNSTDPGVFTDLASVDNSE<br>FQQLLNQGVSM SHSTAEPMLMEYPEAITRLVTG<br>SQRPPDPAPTPLGTSGLPNGLSGDEDFSSIADM<br>DFSALLSQISSLEHHHHHH                                | Baughman, H. E. R., Narang, D., Chen, W., Villagrán Suárez, A. C., Lee, J., Bachochin, M. J., Gunther, T. R., Wolynes, P. G., & Komives, E. A. (2022). An intrinsically disordered transcription activation domain increases the DNA binding affinity and reduces the specificity of NFκB p50/RelA. <i>The Journal of Biological Chemistry</i> , 298(9), 102349.                                                                                                                                       |
| EIF_450_1_249 | 52 | 0 | GSMTDETAHPTQSASKQESAALKQTGDDQQES<br>QQQRGYTNYNNGSNYTKKKPYNSNRPHQQRG<br>GKFGPNRYNRRGNNGGGSFRGGHMGANSSN<br>VPWTGYNNYPVYYPQMQMAAAGSAPANPIPV<br>EEKSPVPTKIEITTKSGEHLDLKEQHKAKLQSQE<br>RSTVSPQPESKLKETS DSTSTSTPTPTPSTNDSK<br>ASSEENISEAEKTRRFIEQVKLRKAALEKKRKE<br>QLEGSSGNNNIPMKTTPENVEEK | Chaves-Arquero, B., Martínez-Lumbreras, S., Sibille, N., Camero, S., Bernadó, P., Jiménez, M. Á., Zorrilla, S., & Pérez-Cañadillas, J. M. (2022). eIF4G1 N-terminal intrinsically disordered domain is a multi-docking station for RNA, Pab1,                                                                                                                                                                                                                                                          |

|                |    |   |                                                                                                                                                                                                                                                                                              |                                                                                                                                                                                                                                                                                                                                                       |
|----------------|----|---|----------------------------------------------------------------------------------------------------------------------------------------------------------------------------------------------------------------------------------------------------------------------------------------------|-------------------------------------------------------------------------------------------------------------------------------------------------------------------------------------------------------------------------------------------------------------------------------------------------------------------------------------------------------|
|                |    |   |                                                                                                                                                                                                                                                                                              | Pub1, and self-assembly. <i>Frontiers in Molecular Biosciences</i> , 9, 986121.                                                                                                                                                                                                                                                                       |
| TIF2_624_774   | 37 | 0 | ERADGQSRLHDSKGQTKLLQLLTTKSDQMEPSP<br>LASSLSDTNKDSTGSLPGSGSTHGTSLKEKHIL<br>HRLLDSSSPVDLAKLTAEATGKDLSQESSSTAP<br>GSEVTIKQEPVSPKKKENALLRYLLDKDDTKDIGL<br>PEITPKLERLDSKT                                                                                                                         | Senicourt, L., le Maire, A., Allemand, F., Carvalho, J. E., Guee, L., Germain, P., Schubert, M., Bernadó, P., Bourguet, W., & Sibille, N. (2021). Structural insights into the interaction of the intrinsically disordered co-activator TIF2 with retinoic acid receptor heterodimer (RXR/RAR). <i>Journal of Molecular Biology</i> , 433(9), 166899. |
| IR_CTD         | 38 | 0 | GPRRNQPAEQTTTTTHTVQQQTGGNTPAQG<br>GTDATRAEDASLNRRDSQGSVASTHWSDSSE<br>VVNPYAEVGGARNLSAHQPEEHYDEVAADPG<br>YSVIQNFSGSGPVTGRLIGTPGQGIQSTYALLAN<br>SGGLRLGMGGLTSGGESAVSSVNAAPTGPVVR<br>FVWSHPQFEK                                                                                                 | TBD                                                                                                                                                                                                                                                                                                                                                   |
| Tau_ht35_2022  | 46 | 0 | EPPKSGDRSGYSSPGSPGTPGSRSRTPSLPTPP<br>TREPKKVAVVRTPPKSPSSAKSRLQTAPVPMMPD<br>LKNVKSIGSTENLKHQPGGGKQVIINKKLDLSN<br>VQSKCGSKDNIKHVPGGGSVQIVYKPVDSLKVT<br>SKCGSLGNIHHKPGGGQVEVKSEKLDKDFKDRVQS<br>KIGSLDNITHVPGGGNKKIETHKLTFRENAKAKTD<br>HGAEIVYKSPVVSAGDTSRHLNSVSSTGSIDMVD<br>SPQLATLADEVASLAKQGL | Lyu, C., Da Vela, S., Al-Hilaly, Y., Marshall, K. E., Thorogate, R., Svergun, D., Serpell, L. C., Pastore, A., & Hanger, D. P. (2021). The Disease Associated Tau35 Fragment has an Increased Propensity to Aggregate Compared to Full-Length Tau. <i>Frontiers in Molecular Biosciences</i> , 8, 779240.                                             |
| Tau_ht410_2N3R | 63 | 0 | MAEPRQEFVEMEDHAGTYGLGDRKDQGGYTM<br>HQDQEGD TDAGLKESPLQTP TEDGSEEPGSETS<br>DAKSTPTAEDVTAPLVDEGAPGKQAAAQPHEIP<br>EGTTAEEAGIGDTPSLEDEAAGHV TQARMVSKS                                                                                                                                            | Lyu, C., Da Vela, S., Al-Hilaly, Y., Marshall, K. E., Thorogate, R., Svergun, D., Serpell, L. C., Pastore, A., & Hanger, D. P.                                                                                                                                                                                                                        |

|                |    |   |                                                                                                                                                                                                                                                                                                                                                                                                                                                                                                           |                                                                                                                                                                                                                                                                                                           |
|----------------|----|---|-----------------------------------------------------------------------------------------------------------------------------------------------------------------------------------------------------------------------------------------------------------------------------------------------------------------------------------------------------------------------------------------------------------------------------------------------------------------------------------------------------------|-----------------------------------------------------------------------------------------------------------------------------------------------------------------------------------------------------------------------------------------------------------------------------------------------------------|
|                |    |   | KDGTGSDDKKAKGADGKTKIATPRGAAPPQKQK<br>QANATRIPAKTPPAPKTPPSSGEPPKSGDRSGY<br>SSPGSPGTPGSRSRTPSLPTPPTREPKKVAVVR<br>TPPKSPSSAKSRLQTAPVPMPDLKNVSKIGSTE<br>NLKHQPGGGKVQIVYKPVDSLKVTSKCGSLGNIH<br>HKPGGGQVEVKSEKLDKDRVQSKIGSLDNITHV<br>PGGGNKKIETHKLTFRENAKAKTDHGAEIVYKSP<br>VVGDTSPRHLSNVSSSTGSIDMVDSPQLATLAD<br>EVSASLAKQGL                                                                                                                                                                                     | (2021). The Disease Associated Tau35 Fragment has an Increased Propensity to Aggregate Compared to Full-Length Tau. <i>Frontiers in Molecular Biosciences</i> , 8, 779240.                                                                                                                                |
| Tau_ht410_2N4R | 67 | 0 | MAEPRQEFVEMEDHAGTYGLGDRKDQGGYTM<br>HQDQEGDTDAGLKESPLQTPTEGSEEPGSETS<br>DAKSTPTAEDVTAPLVDEGAPGKQAAAQPHTEIP<br>EGTTAEEAGIGDTPSLEDEAAGHVQARMVSKS<br>KDGTGSDDKKAKGADGKTKIATPRGAAPPQKQK<br>QANATRIPAKTPPAPKTPPSSGEPPKSGDRSGY<br>SSPGSPGTPGSRSRTPSLPTPPTREPKKVAVVR<br>TPPKSPSSAKSRLQTAPVPMPDLKNVSKIGSTE<br>NLKHQPGGGKVQIINKLDLSNVQSKCGSKDNIK<br>HVPGGGSVQIVYKPVDSLKVTSKCGSLGNIHHKP<br>GGGQVEVKSEKLDKDRVQSKIGSLDNITHVPG<br>GGNKKIETHKLTFRENAKAKTDHGAEIVYKSPVV<br>SGDTSPRHLSNVSSSTGSIDMVDSPQLATLADEV<br>SASLAKQGL | Lyu, C., Da Vela, S., Al-Hilaly, Y., Marshall, K. E., Thorogate, R., Svergun, D., Serpell, L. C., Pastore, A., & Hanger, D. P. (2021). The Disease Associated Tau35 Fragment has an Increased Propensity to Aggregate Compared to Full-Length Tau. <i>Frontiers in Molecular Biosciences</i> , 8, 779240. |
| SMAD_linker    | 29 | 0 | GPLPPVLVPRHTEILTELPPLDDYTHSIPENTNFP<br>AGIEPQSNIYIPETPPPGYISEDGETSDQQLNQSM<br>DTGSPAELSPTTLSPVNHSLD                                                                                                                                                                                                                                                                                                                                                                                                       | Gomes, T., Martin-Malpartida, P., Ruiz, L., Aragón, E., Cordeiro, T. N., & Macias, M. J. (2021). Conformational landscape of multidomain SMAD proteins. <i>Computational and Structural Biotechnology Journal</i> , 19, 5210–5224.                                                                        |
| MenV_LBD       | 25 | 0 | TTIKIMDPGVGDGATAAKSKRLFKEAPVVVSGPVI<br>GDNPIVDADTIQLDELARPSLPKTKSQ                                                                                                                                                                                                                                                                                                                                                                                                                                        | Webby, M. N., Herr, N., Bulloch, E. M. M., Schmitz, M., Keown, J. R., Goldstone, D. C., & Kingston, R. L. (2021). Structural Analysis of the Menangle Virus P Protein Reveals a Soft Boundary between Ordered and                                                                                         |

|              |    |   |                                                                                                                                                                                                                                                                                                                                                                                                                          |                                                                                                                                                                                                                                                                                                                                                                                                                         |
|--------------|----|---|--------------------------------------------------------------------------------------------------------------------------------------------------------------------------------------------------------------------------------------------------------------------------------------------------------------------------------------------------------------------------------------------------------------------------|-------------------------------------------------------------------------------------------------------------------------------------------------------------------------------------------------------------------------------------------------------------------------------------------------------------------------------------------------------------------------------------------------------------------------|
|              |    |   |                                                                                                                                                                                                                                                                                                                                                                                                                          | Disordered Regions. <i>Viruses</i> , 13(9).<br><a href="https://doi.org/10.3390/v13091737">https://doi.org/10.3390/v13091737</a>                                                                                                                                                                                                                                                                                        |
| syndecan3_ED | 65 | 0 | MGSSHHHHHSSGLVPRGSMQRWRSENFER<br>PVDLEGSGDDDSFPDDELDDLYSGSGSGYFEQ<br>ESGIETAMETRFSPDVALAVSTTPAVLPTTNIQPV<br>GTPFEELPSEPTLEPATSPVVTEVPEEPSQRA<br>TTVSTTMMETATTAATSTGDPTVATVPATVATATP<br>STPAAPPFTATTAVIRTTGVRLLPLPLTTVATAR<br>ATTPEAPSPPTTAAVLDEAPTPLVSTATSRPR<br>ALPRPATTQEPDIPERSTLPLGTTAPGPTEVAQT<br>PTPETFLTIRDEPEVPVSGGPGDFELPEEETT<br>QPDTANEVVAVGGAAAKASSPPGTLPGARPGP<br>GLLDNAIDSGSSAAQLPQKSILERKEVLVDYKDD<br>DDK | Gondelaud, F., Bouakil, M., Le Fèvre, A., Miele, A. E., Chirot, F., Duclos, B., Liwo, A., & Ricard-Blum, S. (2021). Extended disorder at the cell surface: The conformational landscape of the ectodomains of syndecans. <i>Matrix Biology Plus</i> , 12, 100081.                                                                                                                                                       |
| syndecan4    | 42 | 0 | GSSHHHHHSSGLVPRGSHMESIRETEVIDPQD<br>LLEGRYFSGALPDDEDVVGPGQESDDFELSGSG<br>DLDDLEDSMIGPEVVHPLVPLDNHIPERAGSGSQ<br>VPTEPKKLEENEVIPKRISPEESEDVSNKVSMS<br>STVQGSNIFERTEVLGCPHEHDYKDDDDK                                                                                                                                                                                                                                        | Gondelaud, F., Bouakil, M., Le Fèvre, A., Miele, A. E., Chirot, F., Duclos, B., Liwo, A., & Ricard-Blum, S. (2021). Extended disorder at the cell surface: The conformational landscape of the ectodomains of syndecans. <i>Matrix Biology Plus</i> , 12, 100081.                                                                                                                                                       |
| N_FATZ_1     | 35 | 0 | MAHHHHHHVDDDDKIMPLSGTPAPNKKRKSSKL<br>IMELTGGGQESSGLNLGKKISVPRDVMLEELSLL<br>TNRGSKMFKLRQMRVEKFIYENHPDVFSDDSSMD<br>HFQKFLPTVGGQLGTAGQGFSYSKSNRGGGSQ<br>AGGSGSAGQYGSDDQQHHLGSGSGAGGTGGPA<br>GQAGRGGAAAGTAGVGETGSGDQAGGEAE                                                                                                                                                                                                   | Sponga, A., Arolas, J. L., Schwarz, T. C., Jeffries, C. M., Rodriguez Chamorro, A., Kostan, J., Ghisleni, A., Drepper, F., Polyansky, A., De Almeida Ribeiro, E., Pedron, M., Zawadzka-Kazimierczuk, A., Mlynek, G., Peterbauer, T., Doto, P., Schreiner, C., Hollerl, E., Mateos, B., Geist, L., ... Djinović-Carugo, K. (2021). Order from disorder in the sarcomere: FATZ forms a fuzzy but tight complex and phase- |

|               |    |   |                                                                                                                                                                                                                                          |                                                                                                                                                                                                                                                                                                                                                                                                                                                                                                                                                                                              |
|---------------|----|---|------------------------------------------------------------------------------------------------------------------------------------------------------------------------------------------------------------------------------------------|----------------------------------------------------------------------------------------------------------------------------------------------------------------------------------------------------------------------------------------------------------------------------------------------------------------------------------------------------------------------------------------------------------------------------------------------------------------------------------------------------------------------------------------------------------------------------------------------|
|               |    |   |                                                                                                                                                                                                                                          | separated condensates with $\alpha$ -actinin. Science Advances, 7(22).<br><a href="https://doi.org/10.1126/sciadv.abg7653">https://doi.org/10.1126/sciadv.abg7653</a>                                                                                                                                                                                                                                                                                                                                                                                                                        |
| DeltaN_FATZ_1 | 39 | 0 | GPTVGGQLGTAGQGFSYSKSNRGGGSQAGGS<br>GSAGQYGSDQQHHLGSGSGAGGTGGPAGQAG<br>RGG AAGTAGVGETGSGDQAGGEGKHITVFKTYI<br>SPWERAMGVDPQQKMELGIDLLAYGAKAELPKY<br>KSFNRTAMPYGGYEKASKRMTFQMPKFDLGPLL<br>SEPLVLYNQNLNRPSTFNRTPIWLSGEPVDY<br>NVDIGIPLDGETEEL | Sponga, A., Arolas, J. L., Schwarz, T. C., Jeffries, C. M., Rodriguez Chamorro, A., Kostan, J., Ghisleni, A., Drepper, F., Polyansky, A., De Almeida Ribeiro, E., Pedron, M., Zawadzka-Kazimierczuk, A., Mlynek, G., Peterbauer, T., Doto, P., Schreiner, C., Hollerl, E., Mateos, B., Geist, L., ... Djinović-Carugo, K. (2021). Order from disorder in the sarcomere: FATZ forms a fuzzy but tight complex and phase-separated condensates with $\alpha$ -actinin. Science Advances, 7(22).<br><a href="https://doi.org/10.1126/sciadv.abg7653">https://doi.org/10.1126/sciadv.abg7653</a> |
| histatin_2021 | 15 | 0 | DSHAKRHHGYKRKFHEKHSHRGY                                                                                                                                                                                                                  | Sagar, A., Jeffries, C. M., Petoukhov, M. V., Svergun, D. I., & Bernadó, P. (2021). Comment on the Optimal Parameters to Derive Intrinsically Disordered Protein Conformational Ensembles from Small-Angle X-ray Scattering Data Using the Ensemble Optimization Method. Journal of Chemical Theory and Computation, 17(4), 2014–2021.                                                                                                                                                                                                                                                       |
| synthELP      | 66 | 0 | GGVPGAIPGGVPGGVFYPGAGLGALGGGALGP<br>GGKPLKVPVGGLAGAGLGAGLGAFPAVTFPGAL                                                                                                                                                                    | Lockhart-Cairns, M. P., Newandee, H., Thomson, J.,                                                                                                                                                                                                                                                                                                                                                                                                                                                                                                                                           |

|          |    |   |                                                                                                                                                                                                                                                                                                                                                                                                                                                                                                                                                                                                                                                                                                                                                                 |                                                                                                                                                                                                                                                                                                                                                            |
|----------|----|---|-----------------------------------------------------------------------------------------------------------------------------------------------------------------------------------------------------------------------------------------------------------------------------------------------------------------------------------------------------------------------------------------------------------------------------------------------------------------------------------------------------------------------------------------------------------------------------------------------------------------------------------------------------------------------------------------------------------------------------------------------------------------|------------------------------------------------------------------------------------------------------------------------------------------------------------------------------------------------------------------------------------------------------------------------------------------------------------------------------------------------------------|
|          |    |   | <p>VPGGVADAAAAYKAAKAGAGLGGVPGVGGGLGV<br/> SAGAVWPQPGAGVKPKVPGVGLPGVYPPGGVL<br/> PGARFPGVGLPGVPTGAGVKPKAPGVGGAF<br/> GIPGVGPFGGPQPGVPLGYPIKAPKLPGGYGLP<br/> YTTGKLPYGYGPGGVAGAAGKAGYPTGTGVGP<br/> QAAAAAAKAAAKFGAGAAGVLPVGGAGVPG<br/> VPGAIPGIGGIAGVGTAAAAAATAAAKAAKYGA<br/> AAGLVPGGPGFGPGVVGVPAGVPGVPGVPGAG<br/> IPVVPGAGIPGAAVPGVVSPEAAKAAKAAKYG<br/> ARPGVGVGGIPTYGVGAGGFPGFVGVGGIPG<br/> VAGVPGVGGVPGVGGVPGVGSPEAQAAAAAK<br/> AAKYGVGTPAAAAKAAKAAQFGLVPGVGVAP<br/> GVGVAPGVGVAPGVGLAPGVGVAPGVGVAPGV<br/> GVAPGIGPGGVAAAAKSAKVAKAQLRAAAGL<br/> GAGIPGLGVGVGPGLGVGAGVPLGVGAGVP<br/> GFGAVPGALAAKAAKYGAAVPGVLGGLGALGG<br/> VGIPGGVVGAGPAAAAAATAAAKAAQFGLVGA<br/> AGLGGLVGGLVPGVGGVGGIPAAAAKAAKY<br/> GAAGLGGVLGGAGQFPLGGVAARPGFGLSPIFP<br/> GGACLGKACGRKRK</p> | <p>Weiss, A. S., Baldock, C., &amp; Tarakanova, A. (2020). Transglutaminase-mediated cross-linking of tropoelastin to fibrillin stabilises the elastin precursor prior to elastic fibre assembly. <i>Journal of Molecular Biology</i>, 432(21), 5736–5751.</p>                                                                                             |
| UL11     | 24 | 0 | <p>MGLSFSGTRPCCCRNNVLTDDGEVVSHTAHDF<br/> DVVDIESEEEGNFYVPPDMRGVTRAPGRQLRS<br/> SDPPSRHTRRTPGGACPATQFPPMSDSEWS<br/> HPQFEK</p>                                                                                                                                                                                                                                                                                                                                                                                                                                                                                                                                                                                                                                   | <p>Metrick, C. M., Koenigsberg, A. L., &amp; Heldwein, E. E. (2020). Conserved Outer Tegument Component UL11 from Herpes Simplex Virus 1 Is an Intrinsically Disordered, RNA-Binding Protein. <i>mBio</i>, 11(3). <a href="https://doi.org/10.1128/mBio.00810-20">https://doi.org/10.1128/mBio.00810-20</a></p>                                            |
| GON7_NTD | 31 | 0 | <p>MGHHHHHHENLYFQGELLGEYVQGEGKPQKLR<br/> VSCEAPGDGDPFQGLLSGVAQMKDM/TELFDP<br/> LVQGEVQHRVAAAPDEDLDGDEDDAEDENNID<br/> NRTNFDGPSAKRPKTPS</p>                                                                                                                                                                                                                                                                                                                                                                                                                                                                                                                                                                                                                      | <p>Arrondel, C., Missouri, S., Snoek, R., Patat, J., Menara, G., Collinet, B., Liger, D., Durand, D., Gribouval, O., Boyer, O., Buscara, L., Martin, G., Machuca, E., Nevo, F., Lescop, E., Braun, D. A., Boschat, A.-C., Sanquer, S., Guerrero, I. C., ... Mollet, G. (2019). Defects in t6A tRNA modification due to GON7 and YRDC mutations lead to</p> |



|                     |    |   |                                                                                                                                                                                                                                                                                                                                                                                                                                                               |                                                                                                                                                                                                                                                                                                                                                    |
|---------------------|----|---|---------------------------------------------------------------------------------------------------------------------------------------------------------------------------------------------------------------------------------------------------------------------------------------------------------------------------------------------------------------------------------------------------------------------------------------------------------------|----------------------------------------------------------------------------------------------------------------------------------------------------------------------------------------------------------------------------------------------------------------------------------------------------------------------------------------------------|
|                     |    |   |                                                                                                                                                                                                                                                                                                                                                                                                                                                               | Galloway-Mowat syndrome. Nature Communications, 10(1), 3967.                                                                                                                                                                                                                                                                                       |
| Bmal1_CTD_P62<br>4A | 28 | 0 | GPDASSPGGKKILNGGTPDIPSTGLLPGQAQETP<br>GYPYSDSSSILGENPHIGIDMIDNDQGSSSPSND<br>EAAMAVIMSLLEADAGLGGPVDFSDLPWAL                                                                                                                                                                                                                                                                                                                                                    | Garg, A., Orru, R., Ye, W., Distler, U., Chojnacki, J. E., Köhn, M., Tenzer, S., Sönnichsen, C., & Wolf, E. (2019). Structural and mechanistic insights into the interaction of the circadian transcription factor BMAL1 with the KIX domain of the CREB-binding protein. The Journal of Biological Chemistry, 294(45), 16604–16619.               |
| NID_2059_2325       | 47 | 0 | GPHMQVPRTHRLITLADHICQIITQDFARNQVPS<br>QASTSTFQTSPSALSSTPVRTKTSSRYSPESQS<br>QTVLHPRPGPRVSPENLVDKSRGSRPGKSPERS<br>HIPSEPYEPISPPQGPVAVHEKQDSMLLSQRGVD<br>PAEQRSDSRSPGSISYLPFFTKLESTSPMVKSK<br>KQEIFRKLNSSGGGSDMAAAQPGTEIFNLPAVT<br>TSGAVSSRSHSFADPASNLGLEDIIRKALMGSD<br>DKVEDHGVVMSHPVVGIMPGSASTSVVTSSEARR<br>DE                                                                                                                                                 | Cordeiro, T. N., Sibille, N., Germain, P., Barthe, P., Boulahtouf, A., Allemand, F., Bailly, R., Vivat, V., Ebel, C., Barducci, A., Bourguet, W., le Maire, A., & Bernadó, P. (2019). Interplay of protein disorder in retinoic acid receptor heterodimer and its corepressor regulates gene expression. Structure, 27(8), 1270–1285.e6.           |
| MAP2c               | 67 | 0 | MADERKDEGKAPHWTSASLTEAAHHPHSPENK<br>DQGGSGEGLSRSANGFPYREEEEGAFGEHGSQ<br>GTYSDTKENGINGELTSADRETAEEVSARIVQVV<br>TAEAVAVLKGEQEKEAQHKDQPAALPLAAEETV<br>NLPPSPPPSPASEQTAAL EEATSGESAQAPSAF<br>KQAKDKVTDGITKSPEKRSSLRPPSSILPPRRGV<br>SGDRENSFSLNSSISSARRTRSEPIRRAGKSG<br>TSTPTTPGSTAITPGTPPSYSSRTPGTPGTPSY<br>RTPGTPKSGILVPSEKKVAIIRTPPKSPATPKQLR<br>LINQPLPDLKNVSKIGSTDNIKYQPKGGQVQIVT<br>KKIDLSHVTSKCGSLKNIRHRPGGGRVKIESVKL<br>DFKEKAQAKVGS LDNAHHVPGGGNVKIDSQKLN | Melková, K., Zapletal, V., Jansen, S., Nomilner, E., Zachrdla, M., Hritz, J., Nováček, J., Zweckstetter, M., Jensen, M. R., Blackledge, M., & Žídek, L. (2018). Functionally specific binding regions of microtubule-associated protein 2c exhibit distinct conformations and dynamics. The Journal of Biological Chemistry, 293(34), 13297–13309. |

|         |    |   |                                                                      |                                                                                                                                                                                                               |
|---------|----|---|----------------------------------------------------------------------|---------------------------------------------------------------------------------------------------------------------------------------------------------------------------------------------------------------|
|         |    |   | FREHAKARVDHGAEIITQSPSRSSVASPRRLSNV<br>SSSGSINLLESPQLATLAEDVTAALAKQGL |                                                                                                                                                                                                               |
| TRF2_BR | 17 | 0 | GPPGSMAGGGGSSDGSRAAGRRASRSSGRA<br>RRGRHEPGLGGPAERGAG                 | Necasová, I., Janoušková, E., Klumpler, T., & Hofr, C. (2017). Basic domain of telomere guardian TRF2 reduces D-loop unwinding whereas Rap1 restores it. <i>Nucleic Acids Research</i> , 45(21), 12170–12180. |

## SUPPLEMENTARY REFERENCES

- (1) Lalmansingh, J. M.; Keeley, A. T.; Ruff, K. M.; Pappu, R. V.; Holehouse, A. S. SOURSOP: A Python Package for the Analysis of Simulations of Intrinsically Disordered Proteins. *bioRxiv* 2023. <https://doi.org/10.1101/2023.02.16.528879>.
- (2) Holehouse, A. S.; Garai, K.; Lyle, N.; Vitalis, A.; Pappu, R. V. Quantitative Assessments of the Distinct Contributions of Polypeptide Backbone Amides versus Side Chain Groups to Chain Expansion via Chemical Denaturation. *J. Am. Chem. Soc.* 2015, 137 (8), 2984–2995.
- (3) Rubinstein, M.; Colby, R. H. *Polymer Physics*; Oxford University Press: New York, 2003.
- (4) Martin, E. W.; Holehouse, A. S.; Grace, C. R.; Hughes, A.; Pappu, R. V.; Mittag, T. Sequence Determinants of the Conformational Properties of an Intrinsically Disordered Protein Prior to and upon Multisite Phosphorylation. *J. Am. Chem. Soc.* 2016, 138 (47), 15323–15335.
- (5) Holehouse, A. S.; Sukenik, S. Controlling Structural Bias in Intrinsically Disordered Proteins Using Solution Space Scanning. *J. Chem. Theory Comput.* 2020, 16 (3), 1794–1805.
- (6) Das, R. K.; Huang, Y.; Phillips, A. H.; Kriwacki, R. W.; Pappu, R. V. Cryptic Sequence Features within the Disordered Protein p27Kip1 Regulate Cell Cycle Signaling. *Proc. Natl. Acad. Sci. U. S. A.* 2016, 113 (20), 5616–5621.
- (7) Sherry, K. P.; Das, R. K.; Pappu, R. V.; Barrick, D. Control of Transcriptional Activity by Design of Charge Patterning in the Intrinsically Disordered RAM Region of the Notch Receptor. *Proc. Natl. Acad. Sci. U. S. A.* 2017, 114 (44), E9243–E9252.
- (8) Martin, E. W.; Holehouse, A. S.; Peran, I.; Farag, M.; Incicco, J. J.; Bremer, A.; Grace, C. R.; Soranno, A.; Pappu, R. V.; Mittag, T. Valence and Patterning of Aromatic Residues Determine the Phase Behavior of Prion-like Domains. *Science* 2020, 367 (6478), 694–699.
- (9) Robustelli, P.; Piana, S.; Shaw, D. E. Developing a Molecular Dynamics Force Field for Both Folded and Disordered Protein States. *Proc. Natl. Acad. Sci. U. S. A.* 2018, 115 (21), E4758–E4766.
- (10) Holehouse, A. S.; Das, R. K.; Ahad, J. N.; Richardson, M. O. G.; Pappu, R. V. CIDER: Resources to Analyze Sequence-Ensemble Relationships of Intrinsically Disordered Proteins. *Biophys. J.* 2017, 112 (1), 16–21.
- (11) O'Brien, E. P.; Morrison, G.; Brooks, B. R.; Thirumalai, D. How Accurate Are Polymer Models in the Analysis of Forster Resonance Energy Transfer Experiments on Proteins? *J. Chem. Phys.* 2009, 130 (12), 124903.
- (12) Zheng, W.; Zerze, G. H.; Borgia, A.; Mittal, J.; Schuler, B.; Best, R. B. Inferring Properties of Disordered Chains from FRET Transfer Efficiencies. *J. Chem. Phys.* 2018, 148 (12), 123329.
